# Supplementary material for: Are survival and mortality rates associated with recruitment to clinical trials in teenage and young adult patients with acute lymphoblastic leukaemia? A retrospective observational analysis in England
Source: PubMed Central journal article supplement — BMJ Open. 2017 Oct 5;7(10):e017052. doi: 10.1136/bmjopen-2017-017052 (PMC5639992; doi:10.1136/bmjopen-2017-017052), 2017-10-05
Supplement: bmjopen-2017-017052.draft_revisions.pdf [file bmjopen-2017-017052.draft_revisions.pdf]

# BMJ Open

BMJ Open is committed to open peer review. As part of this commitment we make the peer review history of every article we publish publicly available.

When an article is published we post the peer reviewers' comments and the authors' responses online. We also post the versions of the paper that were used during peer review. These are the versions that the peer review comments apply to.

The versions of the paper that follow are the versions that were submitted during the peer review process. They are not the versions of record or the final published versions. They should not be cited or distributed as the published version of this manuscript.

BMJ Open is an open access journal and the full, final, typeset and author-corrected version of record of the manuscript is available on our site with no access controls, subscription charges or pay-per-view fees (<http://bmjopen.bmj.com>).

If you have any questions on BMJ Open's open peer review process please email [editorial.bmjopen@bmj.com](mailto:editorial.bmjopen@bmj.com)

# BMJ Open

## Are Survival and Mortality Rates Associated with Recruitment to Clinical Trials in Teenage and Young Adult Patients with Acute Lymphoblastic Leukaemia?

|                                 |                                                                                                                                                                                                                                                                                                                                                                                                                                                                                                                                                                                                                                                                        |
|---------------------------------|------------------------------------------------------------------------------------------------------------------------------------------------------------------------------------------------------------------------------------------------------------------------------------------------------------------------------------------------------------------------------------------------------------------------------------------------------------------------------------------------------------------------------------------------------------------------------------------------------------------------------------------------------------------------|
| Journal:                        | <i>BMJ Open</i>                                                                                                                                                                                                                                                                                                                                                                                                                                                                                                                                                                                                                                                        |
| Manuscript ID                   | bmjopen-2017-017052                                                                                                                                                                                                                                                                                                                                                                                                                                                                                                                                                                                                                                                    |
| Article Type:                   | Research                                                                                                                                                                                                                                                                                                                                                                                                                                                                                                                                                                                                                                                               |
| Date Submitted by the Author:   | 19-Apr-2017                                                                                                                                                                                                                                                                                                                                                                                                                                                                                                                                                                                                                                                            |
| Complete List of Authors:       | Hough, Rachael; University College London Hospitals NHS Foundation Trust, Adolescent Haematology<br>Sandhu, Sabrina; National Cancer Registration and Analysis Service<br>Khan, Maria; National Cancer Registration and Analysis Service<br>Moran, Anthony; National Cancer Registration and Analysis Service<br>Feltbower, Richard<br>Stiller, Charles; National Cancer Registration and Analysis Service<br>Stevens, Mike; University of Bristol<br>Rowntree, Clare; University Hospital of Wales<br>Vora, Ajay; Great Ormond Street Hospital For Children NHS Trust<br>McCabe, Martin; University of Manchester, Division of Molecular and Clinical Cancer Sciences |
| <b>Primary Subject Heading</b>: | Haematology (incl blood transfusion)                                                                                                                                                                                                                                                                                                                                                                                                                                                                                                                                                                                                                                   |
| Secondary Subject Heading:      | Evidence based practice                                                                                                                                                                                                                                                                                                                                                                                                                                                                                                                                                                                                                                                |
| Keywords:                       | Clinical trials < THERAPEUTICS, Survival, Teenage and young adult, Acute lymphoblastic leukaemia                                                                                                                                                                                                                                                                                                                                                                                                                                                                                                                                                                       |
|                                 |                                                                                                                                                                                                                                                                                                                                                                                                                                                                                                                                                                                                                                                                        |

SCHOLARONE™  
Manuscripts

**TITLE:**

**Are Survival and Mortality Rates Associated with Recruitment to Clinical Trials in Teenage and Young Adult Patients with Acute Lymphoblastic Leukaemia?**

**RUNNING TITLE:**

Impact of Trial Recruitment in TYA ALL

**AUTHORS:**

Rachael Hough University College Hospital, 250 Euston Road, London. NW1 2PG. UK

Sabrina Sandhu National Cancer Registration and Analysis Service, Public Health England, Wellington House, 133-155 Waterloo Road, London. SE1 8UG. UK

Maria Khan National Cancer Registration and Analysis Service, Public Health England, Wellington House, 133-155 Waterloo Road, London. SE1 8UG. UK

Anthony Moran National Cancer Registration and Analysis Service, Public Health England, Wellington House, 133-155 Waterloo Road, London. SE1 8UG. UK

Richard Feltbower Division of Epidemiology & Biostatistics, School of Medicine, University of Leeds, Leeds, LS2 9JT, UK

Charles Stiller National Cancer Registration and Analysis Service, Public Health England, Old Road Campus Research Building, Roosevelt Drive, Oxford, OX3 7DQ UK

Mike CG Stevens University of Bristol, Tyndall Avenue, Bristol. BS8 1TH. UK

Clare Rowntree University Hospital of Wales, Heath Park, Cardiff. CF14 4XW. UK

Ajay Vora Sheffield Children's Hospital, Western Bank, Sheffield. S10 2TH. UK

Martin G McCabe Division of Molecular and Clinical Cancer Sciences, University of Manchester, Manchester Academic Health Science Centre, Grafton Street, Manchester. M13 9NT. UK

**CORRESPONDENCE:**

Dr Rachael Hough

Department of Haematology University College Hospital, London, NW1 2PG UK

Tel: 00447711157526

Fax: 00442034479064

e-mail: [rachael.hough@uclh.nhs.uk](mailto:rachael.hough@uclh.nhs.uk)

For peer review only

**ABSTRACT****Objective**

Participation rates in clinical trials are low in teenagers and young adults (TYA) with cancer.

Whilst the importance of clinical trials in informing best practice is well established, data regarding individual patient benefit are scarce. We have investigated the association between overall survival and trial recruitment in TYA patients with acute lymphoblastic leukaemia (ALL).

**Design**

Retrospective

**Setting**

National (England) TYA patients treated for ALL

**Participants**

511 patients aged 15-24 years diagnosed with ALL between 2004 to 2010 inclusive, of whom 239 (46.7%) participated in the UKALL2003 trial.

**Outcome Measures**

Patients were identified using National Clinical Trial (UKALL2003) and Cancer Registry (National Cancer Data Repository, English National Cancer Online Registration Environment) Databases. Relative survival rates were calculated for trial and non-trial patients and observed differences were modelled using a multiple regression approach. The numbers and percentages of deaths in those patients included in the survival analysis were determined for each three-month period, P values were calculated using the two-tailed z-test for difference between proportions and 95% confidence intervals for percentage deaths were derived using the Binomial distribution based on the Wilson Score method.

## Results

Patients treated on the trial had a 17.9% better two-year survival (85.4% vs 67.5%,  $p < 0.001$ ) and 8.9% better one-year survival (90.8% vs 81.9%,  $p = 0.004$ ) than those not on the trial. 35 (14.6%) patients recruited to the trial died in the two years following diagnosis compared with 86 (32.6%) of those not recruited ( $p < 0.001$ ).

## Conclusions

TYA patients recruited to the clinical trial UKALL 2003 in England had a lower risk of mortality and a higher overall survival than contemporaneous non-trial patients. These data underline the potential for individual patient benefit in joining a clinical trial and the importance of international efforts to increase trial participation in the TYA age group.

## STRENGTHS AND LIMITATIONS OF THIS STUDY

The study asks a fundamental question regarding the value to an individual of recruitment to a clinical trial

Large sample size including all TYA patients aged 15-24 years diagnosed with ALL in England between 2004-2010

This retrospective study is possible because a) the consent process for UKALL2003 included explicit consent for the trial data to be shared with regional and national cancer registries, and b) because the UK has full population coverage for cancer registration

Potential confounding variables include selection bias, centre effect and recruitment to other clinical trials

1  
2  
3  
4  
5  
6  
7  
8  
9  
10  
11  
12  
13  
14  
15  
16  
17  
18  
19  
20  
21  
22  
23  
24  
25  
26  
27  
28  
29  
30  
31  
32  
33  
34  
35  
36  
37  
38  
39  
40  
41  
42  
43  
44  
45  
46  
47  
48  
49  
50  
51  
52  
53  
54  
55  
56  
57  
58  
59  
60

**FUNDING**

This research received no specific grant from any funding agency in the public, commercial or not-for-profit sectors.

For peer review only

## INTRODUCTION

Although survival rates in teenage and young adult (TYA) patients with cancer have improved over the last two decades (O'Hara et al. 2015), these outcome gains have been modest and cancer remains the leading cause of non-accidental mortality in the TYA age group (Barr 2011; Meadows 2003).

The barriers to improving survival are likely to be multifactorial and include sub-optimal diagnostic pathways, complex tumour and host biology, access to age or site specific specialist care and poor compliance with treatment (Fern et al. 2014; Burke, Albritton, and Marina 2007). Importantly, recruitment rates to clinical trials in TYA cancer patients are the lowest of any age group (Bleyer et al. 1997; Burke, Albritton, and Marina 2007; Krailo et al. 1993; Fern et al. 2008). In those patients for whom clinical trials are available, factors influencing participation include whether the treating physician is from a paediatric or adult background (Tai et al. 2014; Parsons et al. 2011; Downs-Canner and Shaw 2009; Mitchell et al. 2004; Burke, Albritton, and Marina 2007), the type of treating centre (academic, tertiary or other)(Tai et al. 2014), and patient factors, notably the acceptability to and attitudes of TYA patients (Grigsby et al. 2014). In addition, there are often fewer clinical trials available to TYA patients than to younger or older cancer patients (Krailo et al. 1993; Shaw and Ritchey 2007; Fern et al. 2008), reflecting the unique distribution of tumours in this age group and the traditional separation between adult and paediatric clinical research programmes (Burke, Albritton, and Marina 2007).



1  
2  
3 Whilst sequential clinical trials clearly inform evidence based best practice in cancer therapy  
4  
5 and have improved outcomes in specific disease types (Stiller and Eatock 1999), the value of  
6  
7 participation for an individual patient is less clear. The benefits may include access to a  
8  
9 superior therapy not otherwise available, enhanced quality of care, access to a broader  
10  
11 team of specialised professionals (Ferrari and Bleyer 2007) and stricter adherence to trial  
12  
13 mandated treatment. However, to date, no study has demonstrated a survival advantage  
14  
15 specifically associated with trial participation in TYA patients (Kumar et al. 2005; Peppercorn  
16  
17 et al. 2004).

18  
19  
20  
21  
22  
23  
24 Here, we report survival outcomes of TYA patients with acute lymphoblastic leukaemia (ALL)  
25  
26 in England who were treated within or outside of the national clinical trial, UKALL2003.  
27  
28  
29

## 30 31 **METHODS**

### 32 33 34 35 36 **UKALL2003**

37  
38 UKALL2003 was the UK clinical trial of minimal residual disease (MRD)-directed  
39  
40 chemotherapy for Philadelphia chromosome negative ALL in children and young people  
41  
42 aged 1 to 24 years, which opened in 2003 and closed in 2011. The maximum age for trial  
43  
44 entry was the 18<sup>th</sup> birthday when the trial began, but was increased to the 20<sup>th</sup> birthday in  
45  
46 2006 and the 25<sup>th</sup> birthday in 2007. Details of the protocol and outcomes of the trial have  
47  
48 been published previously (Vora et al. 2014; Vora et al. 2013; Hough et al. 2016).  
49  
50  
51  
52  
53  
54  
55  
56  
57  
58  
59  
60

## Study Population

The study population for this analysis was defined as any patient diagnosed with ALL in 2004-2010 (the 7 complete years during which UKALL2003 was recruiting), aged 15-24 years and resident in England at the time of diagnosis. Details were obtained on the 337 TYA patients who took part in the UKALL2003 Trial including name, date of birth and hospital of treatment, but not address or country of residence. Details of missing NHS numbers on UKALL2003 were obtained using the NHS Strategic Tracing Service (NSTS), which contains details of all individuals registered with a GP in England or Wales. The National Cancer Data Repository (NCDR) was the database used to undertake cancer analyses at the time this study commenced. It included details of all patients diagnosed with cancer who were resident in England. A frozen copy of NCDR was compiled from the eight regional registries then in existence, when cancer data for a given calendar year were considered to be near complete – a process which took considerable time. The version used in this study was that produced when 2010 data were considered complete. The patients in UKALL2003 were matched against those on the NCDR database who were diagnosed in 2004-2010 aged 15-24 with any cancer. Patients recorded on NCDR as having ALL and who were not on the UKALL database were included in our study as the non-trial arm.

The move to a single cancer registry for England, which was completed while this study was underway, resulted in the production of the English National Cancer Online Registration Environment (ENCORE). This is a live database, which is updated regularly. It is used by registry staff to determine if a given patient has already been registered. It contains details of all residents of England who have been diagnosed with cancer, including patients reported to the National Cancer Registration and Analysis Service (NCRAS) but with

1  
2  
3 insufficient details to be counted as a case of cancer; these are called provisional  
4  
5 registrations and are upgraded to full registrations when further details are obtained.  
6  
7 ENCORE also contains details of cancer patients managed at a hospital in England but  
8  
9 resident elsewhere. Patients on the UKALL database not found on NCDR were manually  
10  
11 checked on ENCORE, in order to determine the reasons why these patients were not on  
12  
13 NCDR and to identify any patients reported to NCRAS after the NCDR was compiled. Those  
14  
15 whose records were found on ENCORE and who fulfilled the study definition were added to  
16  
17 patients on both UKALL and NCDR to make up the trial arm in our study.  
18  
19  
20  
21  
22  
23

24 Details of patients on the UKALL database but not found on ENCORE were checked against  
25  
26 the NSTS to determine whether living in England or Wales. The UKALL database was  
27  
28 interrogated for the country of the treating hospital for those patients not found on NSTS.  
29  
30  
31  
32

### 33 **Analyses**

34  
35 We determined the number and percentage of patients who participated in UKALL2003 by  
36  
37 year of diagnosis and age group. Survival rates were calculated for patients in the trial and  
38  
39 not in the trial, excluding patients on whom the only available data were from death  
40  
41 certificates – death certificate only (DCO) registrations. Death details were obtained from  
42  
43 NCDR up to the end of 2012, with follow-up starting from the date of diagnosis recorded on  
44  
45 NCDR; the equivalent data were obtained from ENCORE for those patients not found on  
46  
47 NCDR. One-year, two-year and two-year conditional on one-year relative survival rates  
48  
49 were calculated for 15-24, 15-19 and 20-24 year olds for trial and non-trial patients.  
50  
51  
52  
53  
54  
55 Relative survival was estimated from life tables stratified by age, sex and time using the  
56  
57  
58  
59  
60

1  
2  
3 Stata strs programme (Dickman et al. 2013). Expected survival was estimated using the  
4  
5 Ederer II method.  
6  
7

8  
9  
10 Differences in relative survival were modelled using a multiple regression approach based  
11  
12 on generalised linear models, assuming a Poisson distribution for the observed number of  
13  
14 deaths (Dickman et al. 2004). Differences were considered statistically significant if two-  
15  
16 sided P values were  $<0.05$ . All statistical analyses were conducted using Stata version 13.  
17  
18

19  
20  
21 The numbers of deaths in those patients included in the survival analysis were determined  
22  
23 for each three-month period during the two years of follow-up and percentages calculated  
24  
25 based on the number of patients alive at the beginning of each three-month period. P  
26  
27 values were calculated using the two-tailed z-test for difference between proportions. 95%  
28  
29 confidence intervals for percentage deaths were derived using the Binomial distribution  
30  
31 based on the Wilson Score method (Observatories 2008).  
32  
33  
34  
35  
36  
37

### 38 **Completion of TYAC form**

39  
40 During 2009 and 2010, enhanced cancer registration forms were in use throughout the  
41  
42 English TYA Principal Treatment Centres (PTCs). The forms were developed by the  
43  
44 professional organisation Teenagers and Young Adults with Cancer (TYAC)  
45  
46 (<http://www.tyac.org.uk>) and were collected and matched with registry data by the lead UK  
47  
48 regional registry for TYA cancer at the time, the North West Cancer Intelligence Service  
49  
50 (now part of Public Health England). Receipt of a TYAC form by the registry was used as a  
51  
52 proxy that the patient's management had been provided by or at least discussed with the  
53  
54 regional TYA PTC. We calculated the percentage of patients in the trial for whom a TYAC  
55  
56  
57  
58  
59  
60

1  
2  
3 form was completed to explore the relationship between access to TYA specialist services  
4  
5 and participation in the trial.  
6  
7  
8  
9

## 10 RESULTS

### 11 Study population

12  
13  
14  
15  
16  
17 The process by which the study population was selected is shown in Figure 1. Details on 227  
18  
19 of the 337 patients on the UKALL database were found on NCDR; twenty of whom had a  
20  
21 diagnosis other than ALL on NCDR. The most common diagnoses were leukaemia (5), acute  
22  
23 leukaemia (4), acute myeloid leukaemia (4) and Non-Hodgkin lymphoma (4). 272 patients  
24  
25 with a diagnosis of ALL on NCDR were not on the UKALL database and these constituted the  
26  
27 non-trial arm of this study.  
28  
29  
30  
31  
32

33  
34 Of the 110 patients on UKALL2003 not found on NCDR, 43 were identified on ENCORE. 31  
35  
36 did not fulfil the study definition for the following reasons:

- 37 (a) 26 were diagnosed in 2011
- 38 (b) One diagnosed in 2003
- 39 (c) One aged 14 at time of diagnosis
- 40 (d) One treated in England but not a resident
- 41 (e) Two were provisional registrations that were not confirmed
- 42
- 43
- 44
- 45
- 46
- 47
- 48
- 49

50  
51 The twelve patients who fulfilled the study definition had been reported to the NCRAS after  
52  
53 the NCDR was compiled. These patients were added to the 227 found on both the  
54  
55 UKALL2003 and NCDR databases to make up the trial arm of this study.  
56  
57  
58  
59  
60

1  
2  
3  
4  
5 Of the 67 patients on the UKALL2003 database not found on ENCORE, 60 were not resident  
6 in England confirmed by having a non-English address on NSTS and/or the treating hospital  
7 recorded on UKALL2003 as being outside England. The remaining seven patients, who did  
8 fulfil the study definition, were excluded for a number of reasons, including not being  
9 reported to the registry by the treating hospital or insufficient details provided to allow a  
10 full registration, and inaccurate personal details on the UKALL2003 database resulting in  
11 patients not being found on ENCORE.  
12  
13  
14  
15  
16  
17  
18  
19  
20  
21  
22  
23

### 24 **Participation in UKALL2003**

25  
26 A total of 511 patients aged 15-24 years were included in the analyses, of whom 239  
27 (47.5%) had participated in UKALL2003 (Table 1a). The overall number of 20-24 year old  
28 patients recruited (36 patients) was lower than 18-19 year olds (54 patients) and 15-17 year  
29 olds (149 patients). In total, 203 (84.9%) of 239 trial patients were aged 15-19 years. Trial  
30 participation improved over time, from 59.3% in 2004-2007 to 76.7% in 2008-2010 ( $p =$   
31 0.007) in the 15-17 year old group (the only group eligible for the trial for the entire study  
32 period)(Table 1b). It is likely that the sequential changes in age eligibility criteria for  
33 UKALL2003 were partly responsible for low recruitment numbers in the older age groups.  
34 However, for the period 2008-2010, during which all 15-24 year olds were eligible for the  
35 study, participation remained higher in younger patients: 76.3% of 15-19 year olds  
36 compared with 45.1% of 20-24 year olds ( $p < 0.001$ ).  
37  
38  
39  
40  
41  
42  
43  
44  
45  
46  
47  
48  
49  
50  
51  
52  
53  
54  
55  
56  
57  
58  
59  
60

### Survival

503 patients were included in the survival analysis: 239 in the trial arm and 264 in the non-trial arm. Patients aged 15-24 years recruited to the UKALL2003 trial had 17.9% better two-year survival (85.4% vs 67.5%,  $p < 0.001$ ), 8.9% better one-year survival (90.8% vs 81.9%,  $p = 0.004$ ) and 11.6% better two-year survival conditional on one-year survival (94.1% vs 82.5%,  $p = 0.001$ ) compared to non-trial patients (Table 2, Figure 2). To determine whether the effects of trial recruitment on survival were measurable across the age cohort we analysed 15-19 year olds and 20-24 year olds separately. The differences in survival at all time points remained significant in the 15-19 year old age group (Table 2). Two-year and conditional two-year survival showed a non-significant trend to better in trial patients than non-trial patients in the 20-24 year old cohort.

To determine whether the deaths were evenly spaced after diagnosis we next analysed the number of deaths in trial and non-trial patients by quarter-year from diagnosis. Table 3 shows the number and percentage of deaths by trial status for each quarter-year and year of follow-up. A total of 35 (14.6%) trial patients died in the two years following diagnosis compared with 86 (32.6%) of non-trial patients ( $p < 0.001$ ). The difference in the proportion of deaths between trial and non-trial patients was 9% (18.2% - 9.2%;  $p = 0.004$ ) fewer deaths in trial patients during the first year and 11.6% (17.6% - 6.0%;  $p < 0.001$ ) during the second. However, the largest number of deaths overall and the largest difference between trial and non-trial patients for any quarter was in the first three months after diagnosis: 6 (2.5%) trial patients died compared with 21 (8.0%) non-trial patients ( $p = 0.007$ ).

### Exploratory analysis of trial recruitment by place of care

The data available in national registry records were not sufficient to allow us to determine the reasons for non-recruitment of non-trial patients or how non-trial patients were treated. However, we were able to compare trial recruitment rates between patients for whom an enhanced TYAC cancer registration form had been submitted and those with no TYAC form. The trial recruitment rates were significantly different between the two groups: 73.5% of patients with a submitted TYAC form were recruited compared to 51.9% of those for whom a form was not submitted ( $p=0.001$ , Table 4). The difference was highest among patients aged 20-24 years (61.5% trial recruitment among patients with associated TYAC forms versus 36.4% without). Patients for whom a TYAC form was submitted had a two-year survival of 80.8% compared with 82.8% for those without a form ( $p = 0.771$ ).

### DISCUSSION

By combining trial and national cancer registry data we have demonstrated a significant survival advantage to participation in the most recently completed, large prospective clinical trial for TYA patients with ALL, which is measurable at a population level. This is the first study to have demonstrated such a survival advantage in any cancer type in the TYA age group. The difference in survival was highly significant and equated to a survival benefit at two years of approximately 130% in trial patients compared to non-trial patients. The risk of mortality at 2 years in those treated outside of the trial was twice that of those on UKALL2003 (32.6% compared to 14.6%,  $p<0.001$ ) and was most striking during the first 3 months after diagnosis (8.0% compared to 2.5%,  $p=0.007$ ).



1  
2  
3 This retrospective analysis of the impact of clinical trial recruitment on survival was possible  
4  
5 because the consent process for UKALL2003 included explicit consent for the trial data to be  
6  
7 shared with regional and national cancer registries, and because the UK has full population  
8  
9 coverage for cancer registration. This study, however, did show a number of limitations of  
10  
11 the cancer registration system for England during the period 2004-2010 including a)  
12  
13 Accuracy of diagnosis: twenty patients on UKALL2003 with a diagnosis other than ALL on  
14  
15 NCDR and b) Timeliness: twelve patients on ENCORE but not on NCDR. In addition, the main  
16  
17 source of diagnostic data for cancer registries during the study period was histopathology  
18  
19 laboratories, leading to difficulties in obtaining high quality data on patients with ALL. Data  
20  
21 were collected by regional registries and then compiled into a national database, which took  
22  
23 considerable time. Public Health England (PHE) has made many improvements since taking  
24  
25 over the NCRAS a few years ago including a) Moving to a single, completely integrated  
26  
27 national registry, b) Setting up systems that report in real time from a wide variety of  
28  
29 sources, such as MDTs, leading to more timely and accurate data and c) Reviewing access to  
30  
31 specialist haematological diagnostic datasets to improve the data quality of haematological  
32  
33 cancers and d) Producing an analysis database that is constantly kept up to date.  
34  
35  
36  
37  
38  
39

40  
41  
42  
43 We also recognise a number of potential confounding variables in this study. Potential  
44  
45 confounders which could increase the observed difference between those on trial compared  
46  
47 to those treated off trial include centre effect and selection bias, and those reducing the  
48  
49 difference include recruitment to other ALL clinical trials.  
50  
51  
52

53  
54  
55 Any potential benefit to participation of young people in clinical trials may be derived from  
56  
57 the treating centre rather than trial participation itself (centre effect). Centres offering  
58  
59  
60

1  
2  
3 clinical trials are often larger, academic institutions, seeing a higher number of patients with  
4  
5 a specific disease, a larger clinical research infrastructure and a more resourced workforce,  
6  
7 all of which may contribute to a more favourable outcome (Ferrari and Bleyer 2007). Over  
8  
9 the last 10 years there has been a gradual reconfiguration of services providing care for  
10  
11 young people aged 16-24 years with cancer in the UK; this includes the development of  
12  
13 Principal Treatment Centres, designated of other hospitals offering TYA services closer to  
14  
15 the patients' homes and an overview of the holistic care of all patients provided by the TYA  
16  
17 multidisciplinary team (MDT). Between 2004 to 2010, these pathways were not fully  
18  
19 established, but the submission of TYAC enhanced cancer registration forms have been used  
20  
21 as a surrogate indicator that an individual patient received treatment according to regionally  
22  
23 agreed and commissioned TYA pathways under the supervision of the TYA PTC. It is  
24  
25 therefore interesting to note that a significantly higher proportion of patients recruited onto  
26  
27 UKALL2003 had been registered centrally via the TYAC notification system than non-trial  
28  
29 patients (73.5% with a TYAC form compared to 51.9% without,  $p=0.001$ ). This was  
30  
31 particularly marked in the older age group. However, the finding that two-year survival was  
32  
33 not higher in those patients with a submitted TYAC form does not support the argument  
34  
35 that the better survival for those in the trial was mainly due to having been managed at  
36  
37 larger centres.  
38  
39  
40  
41  
42  
43  
44  
45  
46  
47

48 Whilst selection bias, in which the highest risk patients (eg those with a very high white  
49  
50 count, renal or hepatic impairment or large mediastinal mass at presentation) could not  
51  
52 participate in the trial, may be a confounder it is unlikely to have had a significant impact on  
53  
54 our results as a) UKALL2003 was a population-based trial for which all children and young  
55  
56 people with ALL were eligible, irrespective of severity or risk group at presentation and b) it  
57  
58  
59  
60

1  
2  
3 also permitted recruitment within 7 days of commencement of chemotherapy. Patients  
4  
5 with Philadelphia chromosome positive (Ph+ve) ALL were ineligible for UKALL2003 , but  
6  
7 Ph+ve patients were included in the non-trial arm, as NCDR did not include details of Ph  
8  
9 chromosome status . The presence of the Philadelphia chromosome in ALL confers a poorer  
10  
11 prognosis (Pui and Evans 2006) and could therefore increase the survival difference  
12  
13 observed in this study. However we feel that this is unlikely to have been a significant  
14  
15 confounding variable since the prevalence of Ph+ve ALL in UKALL2003 overall was only 1.8%  
16  
17 and the observed difference between groups was smaller in the older patients despite the  
18  
19 frequency of the Philadelphia chromosome increasing with increasing age.  
20  
21  
22  
23

24  
25  
26 During the study period, TYA patients with Ph+ve disease were eligible for the ESPHALL or  
27  
28 UKALLXII (until 2006) trials, depending on age, and older patients with Ph-ve disease were  
29  
30 eligible for recruitment onto UKALLXII (lower age limit 18<sup>th</sup> birthday from 2004, 20<sup>th</sup> birthday  
31  
32 from 2006 and 25<sup>th</sup> birthday from 2007). Whilst we do not know the proportions of non-  
33  
34 UKALL2003 patients recruited to these trials, if trial participation in itself confers a survival  
35  
36 advantage, recruitment of patients to these other clinical trials would be expected to reduce  
37  
38 observed differences between our two study groups, reduce any residual confounding from  
39  
40 the exclusion of Ph+ve patients from UKALL2003 and may have also contributed to the  
41  
42 smaller difference in survival between trial and non-trial patients in the 20-24 year old  
43  
44 group.  
45  
46  
47  
48  
49

50  
51  
52 Recruitment to clinical trials in TYA cancer patients is poor due to a range of factors  
53  
54 including lack of an available trial, heterogenous referral pathways, differences in treating  
55  
56 centres as well as lack of desire to participate by this age group (Hendricks-Ferguson et al.  
57  
58  
59  
60

1  
2  
3 2013; Tai et al. 2014; Fern et al. 2014; Grigsby et al. 2014). Overall, approximately 50% of  
4  
5 TYA patients in England with ALL participated in UKALL2003. Although this figure is lower  
6  
7 than the proportion of younger children who participated in the trial, it compares  
8  
9 favourably to other cancer trials reported in this age group; in the UK between 2005 to  
10  
11 2010, only 850 of 2860 patients aged 15–19 years (30%), and 562 of 4011 patients aged 20–  
12  
13 24 years (14%) were recruited to a clinical trial (Fern et al. 2014). Encouragingly,  
14  
15 recruitment to UKALL2003 improved over time. In part, this was expected in the 18-24 year  
16  
17 old group, given the sequential increase in age eligibility criteria over time. However, even  
18  
19 in the 15-17 year old patients who were eligible for participation throughout the study  
20  
21 period, participation increased from 59.3% in 2004-2007 to 76.7% in 2008-2010 ( $p = 0.007$ ).  
22  
23 Despite this, there were still a substantial number of young people who did not participate,  
24  
25 particularly amongst 20-24 year olds, where participation was only 45.1%. Fern et al  
26  
27 propose that there are five factors (five “A’s”) important in improving TYA cancer trial  
28  
29 recruitment; available, accessible, aware, appropriate, and acceptable. The relatively high  
30  
31 level of recruitment of TYA ALL patients to UKALL2003 and its improvement over time  
32  
33 probably reflects an increasing awareness and acceptability amongst paediatric and adult  
34  
35 haematologists that UKALL2003 offered an effective (i.e. appropriate) treatment strategy,  
36  
37 with increasing availability and accessibility as the age range was increased and a greater  
38  
39 number of adult centres opened the trial.  
40  
41  
42  
43  
44  
45  
46  
47  
48  
49

50 In conclusion, we report a specific survival advantage to participation in the UKALL2003 trial  
51  
52 for TYA patients with ALL. This is the first study to have demonstrated a survival advantage  
53  
54 of trial participation in TYA patients with any cancer and suggests a benefit to an individual  
55  
56 patient in taking part. These data highlight the importance of national and international  
57  
58  
59  
60

1  
2  
3 efforts to a) improve recruitment of TYA cancer patients to clinical trials, b) configure TYA  
4  
5 cancer services to provide young people with access to appropriate trials and the  
6  
7 opportunity to participate and c) the need to continue to collect accurate treatment and  
8  
9 outcome data at a population level to allow evaluation of treatment in patients who have  
10  
11 not accessed clinical trials. In England these duties are the responsibilities respectively of  
12  
13 the National Cancer Research Institute, NHS England and Public Health England, working  
14  
15 together towards the goal of best patient outcomes. The data we present suggest that  
16  
17 significant improvements in the delivery of appropriate cancer treatment are still much  
18  
19 needed for this vulnerable young population.  
20  
21  
22  
23  
24  
25

## 26 **ACKNOWLEDGEMENTS AND AUTHOR CONTRIBUTIONS**

27  
28  
29  
30  
31 Patients, families and clinicians participating in UKALL2003

32  
33  
34 Regional and institutional data managers

35  
36 The study was designed by RH, AM, SS, MK, RF, CS and MMC. RH, CR and AV designed,  
37  
38 recruited to and analysed data for the UKALL2003 study. The statistical analysis of this  
39  
40 study was performed by SS, MK, AM and MMC. All authors contributed to the  
41  
42 interpretation of data and preparation of the manuscript and approve this final version.  
43  
44  
45  
46  
47  
48  
49  
50  
51  
52  
53  
54  
55  
56  
57  
58  
59  
60

**COMPETING INTERESTS STATEMENT**

We have read and understood BMJ policy on declaration of interests and declare that we have no competing interests.

**DATA SHARING STATEMENT**

There are no additional unpublished data from this study

For peer review only

## REFERENCES

- 1  
2  
3  
4  
5 Barr, R. D. 2011. 'Adolescents, young adults, and cancer--the international challenge',  
6 *Cancer*, 117: 2245-9.  
7  
8 Bleyer, W. A., H. Tejada, S. B. Murphy, L. L. Robison, J. A. Ross, B. H. Pollock, R. K. Severson,  
9 O. W. Brawley, M. A. Smith, and R. S. Ungerleider. 1997. 'National cancer clinical  
10 trials: children have equal access; adolescents do not', *J Adolesc Health*, 21: 366-73.  
11  
12 Burke, M. E., K. Albritton, and N. Marina. 2007. 'Challenges in the recruitment of  
13 adolescents and young adults to cancer clinical trials', *Cancer*, 110: 2385-93.  
14  
15 Dickman, P. W., P. C. Lambert, E. Coviello, and M. J. Rutherford. 2013. 'Estimating net  
16 survival in population-based cancer studies', *Int J Cancer*, 133: 519-21.  
17  
18 Dickman, P. W., A. Sloggett, M. Hills, and T. Hakulinen. 2004. 'Regression models for relative  
19 survival', *Stat Med*, 23: 51-64.  
20  
21 Downs-Canner, S., and P. H. Shaw. 2009. 'A comparison of clinical trial enrollment between  
22 adolescent and young adult (AYA) oncology patients treated at affiliated adult and  
23 pediatric oncology centers', *J Pediatr Hematol Oncol*, 31: 927-9.  
24  
25 Fern, L. A., J. A. Lewandowski, K. M. Coxon, J. Whelan, Teenage National Cancer Research  
26 Institute, and U. K. Young Adult Clinical Studies Group. 2014. 'Available, accessible,  
27 aware, appropriate, and acceptable: a strategy to improve participation of teenagers  
28 and young adults in cancer trials', *Lancet Oncol*, 15: e341-50.  
29  
30 Fern, L., S. Davies, T. Eden, R. Feltbower, R. Grant, M. Hawkins, I. Lewis, E. Loucaides, C.  
31 Rowntree, S. Stenning, J. Whelan, Teenage National Cancer Research Institute, and  
32 Group Young Adult Clinical Studies Development. 2008. 'Rates of inclusion of  
33 teenagers and young adults in England into National Cancer Research Network  
34 clinical trials: report from the National Cancer Research Institute (NCRI) Teenage and  
35 Young Adult Clinical Studies Development Group', *Br J Cancer*, 99: 1967-74.  
36  
37 Ferrari, A., and A. Bleyer. 2007. 'Participation of adolescents with cancer in clinical trials',  
38 *Cancer Treat Rev*, 33: 603-8.  
39  
40 Grigsby, T. J., E. E. Kent, M. J. Montoya, L. S. Sender, R. A. Morris, A. Ziogas, and H. Anton-  
41 Culver. 2014. 'Attitudes Toward Cancer Clinical Trial Participation in Young Adults  
42 with a History of Cancer and a Healthy College Student Sample: A Preliminary  
43 Investigation', *J Adolesc Young Adult Oncol*, 3: 20-27.  
44  
45 Hendricks-Ferguson, V. L., B. O. Cherven, D. S. Burns, S. L. Docherty, C. R. Phillips-Salimi, L.  
46 Roll, K. A. Stegenga, M. Donovan Stickler, and J. E. Haase. 2013. 'Recruitment  
47 strategies and rates of a multi-site behavioral intervention for adolescents and young  
48 adults with cancer', *J Pediatr Health Care*, 27: 434-42.  
49  
50 Hough, R., C. Rowntree, N. Goulden, C. Mitchell, A. Moorman, R. Wade, and A. Vora. 2016.  
51 'Efficacy and toxicity of a paediatric protocol in teenagers and young adults with  
52 Philadelphia chromosome negative acute lymphoblastic leukaemia: results from  
53 UKALL 2003', *Br J Haematol*, 172: 439-51.  
54  
55 Krailo, M. D., L. Bernstein, J. Sullivan-Halley, and G. D. Hammond. 1993. 'Patterns of  
56 enrollment on cooperative group studies. An analysis of trends from the Los Angeles  
57 County Cancer Surveillance Program', *Cancer*, 71: 3325-30.  
58  
59 Kumar, A., H. Soares, R. Wells, M. Clarke, I. Hozo, A. Bleyer, G. Reaman, I. Chalmers, B.  
60 Djulbegovic, and Group Children's Oncology. 2005. 'Are experimental treatments for  
cancer in children superior to established treatments? Observational study of  
randomised controlled trials by the Children's Oncology Group', *BMJ*, 331: 1295.

- 1  
2  
3 Meadows, A. T. 2003. 'Pediatric cancer survivors: Past history and future challenges', *Curr*  
4 *Probl Cancer*, 27: 112-26.
- 5 Mitchell, A. E., D. L. Scarcella, G. L. Rigutto, V. J. Thursfield, G. G. Giles, M. Sexton, and D. M.  
6 Ashley. 2004. 'Cancer in adolescents and young adults: treatment and outcome in  
7 Victoria', *Med J Aust*, 180: 59-62.
- 8  
9 O'Hara, C., A. Moran, J. S. Whelan, R. E. Hough, C. A. Stiller, M. C. Stevens, D. P. Stark, R. G.  
10 Feltbower, and M. G. McCabe. 2015. 'Trends in survival for teenagers and young  
11 adults with cancer in the UK 1992-2006', *Eur J Cancer*, 51: 2039-48.
- 12 Observatories, Association of Public Health. 2008. "1. APHO. Technical Briefing 3,  
13 Commonly Used Public Health Statistics and their Confidence Intervals " In.
- 14 Parsons, H. M., L. C. Harlan, N. L. Seibel, J. L. Stevens, and T. H. Keegan. 2011. 'Clinical trial  
15 participation and time to treatment among adolescents and young adults with  
16 cancer: does age at diagnosis or insurance make a difference?', *J Clin Oncol*, 29:  
17 4045-53.
- 18  
19 Peppercorn, J. M., J. C. Weeks, E. F. Cook, and S. Joffe. 2004. 'Comparison of outcomes in  
20 cancer patients treated within and outside clinical trials: conceptual framework and  
21 structured review', *Lancet*, 363: 263-70.
- 22  
23 Pui, C. H., and W. E. Evans. 2006. 'Treatment of acute lymphoblastic leukemia', *N Engl J Med*,  
24 354: 166-78.
- 25  
26 Shaw, P. H., and A. K. Ritchey. 2007. 'Different rates of clinical trial enrollment between  
27 adolescents and young adults aged 15 to 22 years old and children under 15 years  
28 old with cancer at a children's hospital', *J Pediatr Hematol Oncol*, 29: 811-4.
- 29  
30 Stiller, C. A., and E. M. Eatock. 1999. 'Patterns of care and survival for children with acute  
31 lymphoblastic leukaemia diagnosed between 1980 and 1994', *Arch Dis Child*, 81:  
32 202-8.
- 33  
34 Tai, E., N. Buchanan, L. Westervelt, D. Elimam, and S. Lawvere. 2014. 'Treatment setting,  
35 clinical trial enrollment, and subsequent outcomes among adolescents with cancer: a  
36 literature review', *Pediatrics*, 133 Suppl 3: S91-7.
- 37  
38 Vora, A., N. Goulden, C. Mitchell, J. Hancock, R. Hough, C. Rowntree, A. V. Moorman, and R.  
39 Wade. 2014. 'Augmented post-remission therapy for a minimal residual disease-  
40 defined high-risk subgroup of children and young people with clinical standard-risk  
41 and intermediate-risk acute lymphoblastic leukaemia (UKALL 2003): a randomised  
42 controlled trial', *Lancet Oncol*, 15: 809-18.
- 43  
44 Vora, A., N. Goulden, R. Wade, C. Mitchell, J. Hancock, R. Hough, C. Rowntree, and S.  
45 Richards. 2013. 'Treatment reduction for children and young adults with low-risk  
46 acute lymphoblastic leukaemia defined by minimal residual disease (UKALL 2003): a  
47 randomised controlled trial', *Lancet Oncol*, 14: 199-209.
- 48  
49  
50  
51  
52  
53  
54  
55  
56  
57  
58  
59  
60



**FIGURE AND TABLE TITLES**

**Figure 1: Study population derived from matching UKALL2003 against the National Cancer**

**Data Repository (NCDR) and ENCORE**

**Figure 2: Two-year relative survival by age group and trial status**

**Table 1: Participation in UKALL2003 by age group and year of diagnosis**

**Table 1a: All Patients**

**Table 1b: Trial Participation over time in 15-17 year olds**

**Table 2: One- and two-year survival by age group and trial status**

**Table 3: Number and percentage of patients aged 15-24 who died in the two years**

**following diagnosis, by 3 month period, year and trial status**

**Table 4: Number and percentage of patients in trial by whether a TYAC form was received**

**by age group in 2009-10**

Table 1: Participation in UKALL2003 by age group and year of diagnosis

Table 1a: All Patients

| Year of diagnosis | 15-17 years |            |           | 18-19 years |            |           | 20-24 years |            |           | 15-24 years |            |           |
|-------------------|-------------|------------|-----------|-------------|------------|-----------|-------------|------------|-----------|-------------|------------|-----------|
|                   | Proportion  | Percentage | 95% CI    |
| 2004              | 19/34       | 55.9       | 39.5-71.1 | 0/6         | 0.0        | 0.0-39.0  | 0/25        | 0.0        | 0-13.3    | 19/65       | 29.2       | 19.6-41.2 |
| 2005              | 26/45       | 57.8       | 43.3-71.0 | 0/20        | 0.0        | 0-16.1    | 0/23        | 0.0        | 0-14.3    | 26/88       | 29.5       | 21.0-39.8 |
| 2006              | 18/29       | 62.1       | 44.0-77.3 | 9/26        | 34.6       | 19.4-53.8 | 0/19        | 0.0        | 0-29.9    | 27/74       | 36.5       | 26.4-47.9 |
| 2007              | 20/32       | 62.5       | 45.3-77.1 | 8/14        | 57.1       | 32.6-78.6 | 4/32        | 12.5       | 5.0-28.1  | 32/78       | 41.0       | 30.8-52.1 |
| 2008              | 23/30       | 76.7       | 59.1-88.2 | 16/18       | 88.9       | 67.2-96.9 | 8/23        | 34.8       | 18.8-55.1 | 47/71       | 66.2       | 54.6-76.1 |
| 2009              | 24/31       | 77.4       | 60.2-88.6 | 13/20       | 65.0       | 43.3-81.9 | 10/26       | 38.5       | 22.4-57.5 | 47/77       | 61.0       | 49.9-71.2 |
| 2010              | 19/25       | 76.0       | 56.6-88.5 | 8/11        | 72.7       | 43.4-90.3 | 14/22       | 63.6       | 43.0-80.3 | 41/58       | 70.7       | 58.0-80.8 |
| 2004-07           | 83/140      | 59.3       | 51.0-67.1 | 17/66       | 25.8       | 16.7-37.4 | 4/99        | 4.0        | 1.6-9.9   | 104/305     | 34.1       | 29.0-39.6 |
| 2008-10           | 66/86       | 76.7       | 66.8-84.4 | 37/49       | 75.5       | 61.9-85.4 | 32/71       | 45.1       | 34.0-56.6 | 135/206     | 45.1       | 34.0-56.6 |
| 2004-10           | 149/226     | 65.9       | 59.5-71.8 | 54/115      | 47.0       | 38.1-56.0 | 36/170      | 21.2       | 15.7-27.9 | 239/511     | 46.8       | 42.5-51.1 |

Table 1b: Trial Participation over time in 15-17 year olds

| Year of diagnosis | Proportion | Percentage | 95% CI    | p value |
|-------------------|------------|------------|-----------|---------|
| 2004-07           | 83/140     | 59.3       | 51.0-67.1 | 0.007   |
| 2008-10           | 66/86      | 76.7       | 66.8-84.4 |         |

1  
2  
3  
4  
5  
6  
7  
8  
9  
10  
11  
12  
13  
14  
15  
16  
17  
18  
19  
20  
21  
22  
23  
24  
25  
26  
27  
28  
29  
30  
31  
32  
33  
34  
35  
36  
37  
38  
39  
40  
41  
42  
43  
44  
45  
46  
47  
48  
49

Table 2: One- and two-year survival by age group and trial status

| Trial Status                                 | Age group | Number of patients | Deaths | Survival (%) | 95% CI    | P value |
|----------------------------------------------|-----------|--------------------|--------|--------------|-----------|---------|
| <b>1-year survival</b>                       |           |                    |        |              |           |         |
| Trial                                        | 15-19     | 203                | 17     | 91.7         | 86.9-94.7 | <0.001  |
| Non-Trial                                    |           | 134                | 30     | 77.6         | 69.6-83.8 |         |
| Trial                                        | 20-24     | 36                 | 5      | 86.2         | 69.8-94.0 | 0.969   |
| Non-Trial                                    |           | 130                | 18     | 86.2         | 79.0-91.1 |         |
| Trial                                        | 15-24     | 239                | 22     | 90.8         | 86.4-93.9 | 0.004   |
| Non-Trial                                    |           | 264                | 48     | 81.9         | 76.6-86.0 |         |
| <b>2-year conditional on 1-year survival</b> |           |                    |        |              |           |         |
| Trial                                        | 15-19     | 186                | 10     | 94.7         | 90.3-97.1 | 0.008   |
| Non-Trial                                    |           | 104                | 16     | 84.7         | 76.2-90.4 |         |
| Trial                                        | 20-24     | 31                 | 3      | 90.4         | 73.0-96.9 | 0.236   |
| Non-Trial                                    |           | 112                | 22     | 80.4         | 71.8-86.7 |         |
| Trial                                        | 15-24     | 217                | 13     | 94.1         | 90.0-96.6 | 0.001   |
| Non-Trial                                    |           | 216                | 38     | 82.5         | 76.7-87.0 |         |
| <b>2-year survival</b>                       |           |                    |        |              |           |         |
| Trial                                        | 15-19     | 203                | 27     | 86.8         | 81.3-90.7 | <0.001  |
| Non-Trial                                    |           | 134                | 46     | 65.7         | 57.0-73.1 |         |
| Trial                                        | 20-24     | 36                 | 8      | 77.9         | 60.5-88.3 | 0.381   |
| Non-Trial                                    |           | 130                | 40     | 69.3         | 60.6-76.5 |         |
| Trial                                        | 15-24     | 239                | 35     | 85.4         | 80.3-89.3 | <0.001  |
| Non-Trial                                    |           | 264                | 86     | 67.5         | 61.5-72.8 |         |

Table 3: Number and percentage of patients aged 15-24 who died in the two years following diagnosis, by 3 month period, year and trial status

| Year        | Quarter | <i>In trial</i>                       |                  |        |           | <i>Not in trial</i>                   |                  |        |           | p values |
|-------------|---------|---------------------------------------|------------------|--------|-----------|---------------------------------------|------------------|--------|-----------|----------|
|             |         | Number of patients at start of period | Number of deaths | % Died | 95% CI    | Number of patients at start of period | Number of deaths | % Died | 95% CI    |          |
|             | 1st     | 239                                   | 6                | 2.5    | 1.2-5.4   | 264                                   | 21               | 8.0    | 5.3-11.9  | 0.007    |
|             | 2nd     | 233                                   | 4                | 1.7    | 0.7-4.3   | 243                                   | 5                | 2.1    | 0.9-4.7   | 0.785    |
|             | 3rd     | 229                                   | 5                | 2.2    | 0.9-5.0   | 238                                   | 11               | 4.6    | 2.6-8.1   | 0.148    |
|             | 4th     | 224                                   | 7                | 3.1    | 1.5-6.3   | 227                                   | 11               | 4.8    | 2.7-8.5   | 0.351    |
| 1st         | -       | 239                                   | 22               | 9.2    | 6.2-13.5  | 264                                   | 48               | 18.2   | 14.0-23.3 | 0.004    |
|             | 5th     | 217                                   | 2                | 0.9    | 0.3-3.3   | 216                                   | 11               | 5.1    | 2.9-8.9   | 0.011    |
|             | 6th     | 215                                   | 4                | 1.9    | 0.7-4.7   | 205                                   | 10               | 4.9    | 2.7-8.7   | 0.0851   |
|             | 7th     | 211                                   | 3                | 1.4    | 0.5-4.1   | 195                                   | 8                | 4.1    | 2.1-7.9   | 0.0965   |
|             | 8th     | 208                                   | 4                | 1.9    | 0.8-4.8   | 187                                   | 9                | 4.8    | 2.6-8.9   | 0.108    |
| 2nd         | -       | 217                                   | 13               | 6.0    | 3.5-10.0  | 216                                   | 38               | 17.6   | 13.1-23.2 | <0.001   |
| 1st and 2nd | -       | 239                                   | 35               | 14.6   | 10.7-19.7 | 264                                   | 86               | 32.6   | 27.2-38.4 | <0.001   |

For peer review only

Table 4: Number and percentage of patients in trial by whether a TYAC form was received by age group in 2009-10

| Age          | <i>Proportion of patients with a TYAC form who were in trial</i> |            |           | <i>Proportion of patients without a TYAC form who were in trial</i> |            |           | p value |
|--------------|------------------------------------------------------------------|------------|-----------|---------------------------------------------------------------------|------------|-----------|---------|
|              | Proportion                                                       | Percentage | 95% CI    | Proportion                                                          | Percentage | 95% CI    |         |
| <b>15-19</b> | 45/57                                                            | 78.9       | 66.7-87.5 | 19/30                                                               | 63.3       | 45.5-78.1 | 0.117   |
| <b>20-24</b> | 16/26                                                            | 61.5       | 42.5-77.6 | 8/22                                                                | 36.4       | 19.7-57.0 | 0.082   |
| <b>15-24</b> | 61/83                                                            | 73.5       | 63.1-81.8 | 27/52                                                               | 51.9       | 38.7-64.9 | 0.011   |

For peer review only

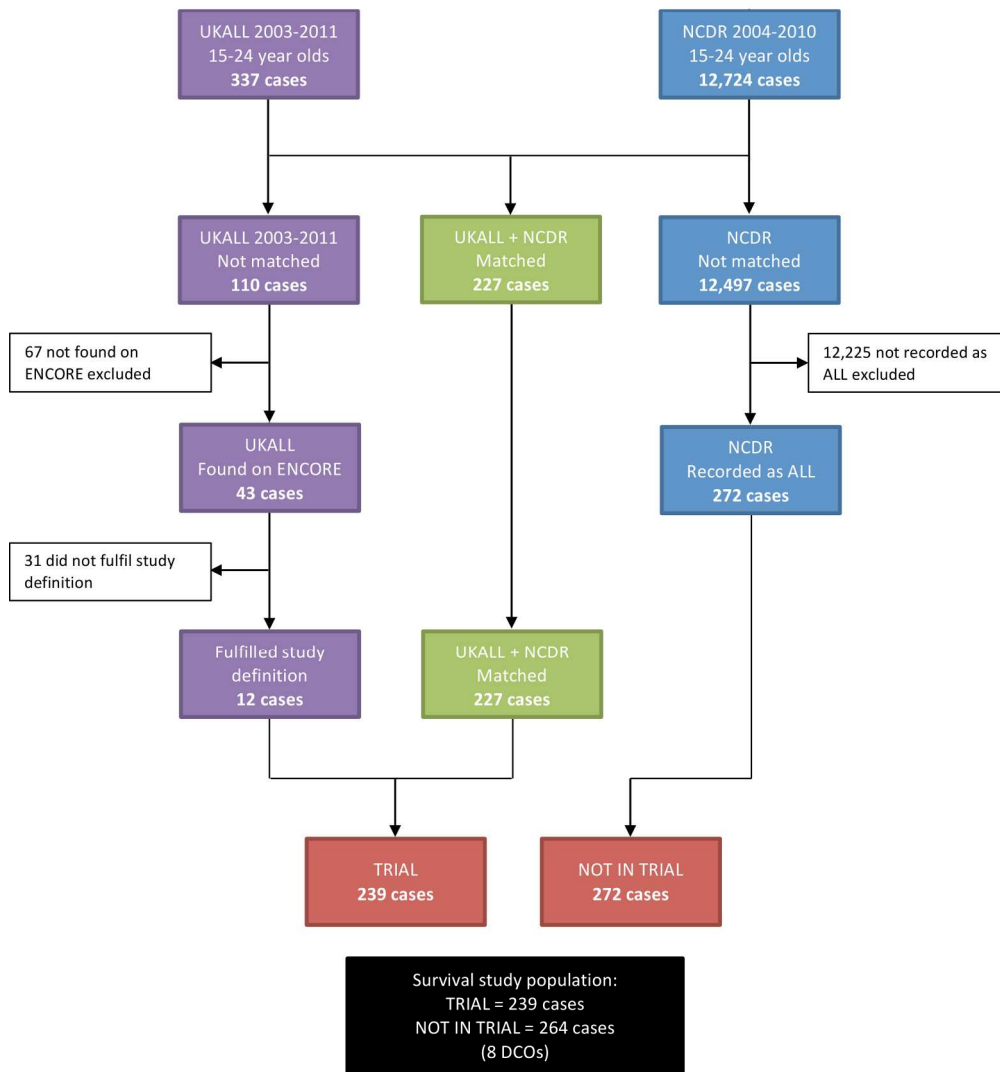

Figure 1: Study population derived from matching UKALL2003 against the National Cancer Data Repository (NCDR) and ENCORE

182x212mm (300 x 300 DPI)

1  
2  
3  
4  
5  
6  
7  
8  
9  
10  
11  
12  
13  
14  
15  
16  
17  
18  
19  
20  
21  
22  
23  
24  
25  
26  
27  
28  
29  
30  
31  
32  
33  
34  
35  
36  
37  
38  
39  
40  
41  
42  
43  
44  
45  
46  
47  
48  
49  
50  
51  
52  
53  
54  
55  
56  
57  
58  
59  
60

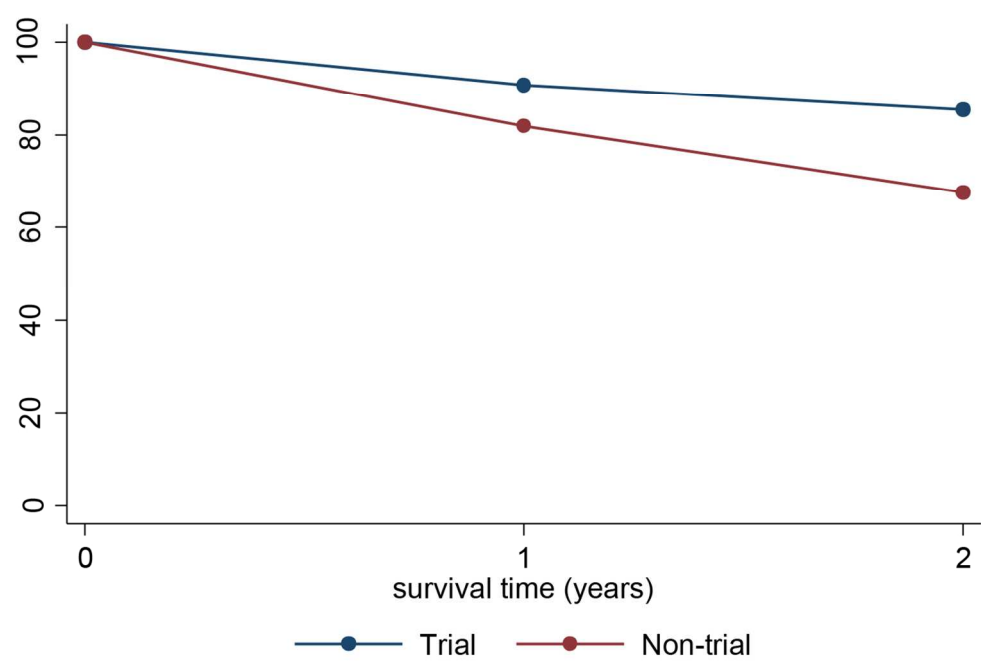

Figure 2: Two-year relative survival by age group and trial status  
122x82mm (300 x 300 DPI)

view only

# BMJ Open

## Are Survival and Mortality Rates Associated with Recruitment to Clinical Trials in Teenage and Young Adult Patients with Acute Lymphoblastic Leukaemia?

|                                 |                                                                                                                                                                                                                                                                                                                                                                                                                                                                                                                                                                                                                                                                        |
|---------------------------------|------------------------------------------------------------------------------------------------------------------------------------------------------------------------------------------------------------------------------------------------------------------------------------------------------------------------------------------------------------------------------------------------------------------------------------------------------------------------------------------------------------------------------------------------------------------------------------------------------------------------------------------------------------------------|
| Journal:                        | <i>BMJ Open</i>                                                                                                                                                                                                                                                                                                                                                                                                                                                                                                                                                                                                                                                        |
| Manuscript ID                   | bmjopen-2017-017052.R1                                                                                                                                                                                                                                                                                                                                                                                                                                                                                                                                                                                                                                                 |
| Article Type:                   | Research                                                                                                                                                                                                                                                                                                                                                                                                                                                                                                                                                                                                                                                               |
| Date Submitted by the Author:   | 14-Jun-2017                                                                                                                                                                                                                                                                                                                                                                                                                                                                                                                                                                                                                                                            |
| Complete List of Authors:       | Hough, Rachael; University College London Hospitals NHS Foundation Trust, Adolescent Haematology<br>Sandhu, Sabrina; National Cancer Registration and Analysis Service<br>Khan, Maria; National Cancer Registration and Analysis Service<br>Moran, Anthony; National Cancer Registration and Analysis Service<br>Feltbower, Richard<br>Stiller, Charles; National Cancer Registration and Analysis Service<br>Stevens, Mike; University of Bristol<br>Rowntree, Clare; University Hospital of Wales<br>Vora, Ajay; Great Ormond Street Hospital For Children NHS Trust<br>McCabe, Martin; University of Manchester, Division of Molecular and Clinical Cancer Sciences |
| <b>Primary Subject Heading</b>: | Haematology (incl blood transfusion)                                                                                                                                                                                                                                                                                                                                                                                                                                                                                                                                                                                                                                   |
| Secondary Subject Heading:      | Evidence based practice                                                                                                                                                                                                                                                                                                                                                                                                                                                                                                                                                                                                                                                |
| Keywords:                       | Clinical trials < THERAPEUTICS, Survival, Teenage and young adult, Acute lymphoblastic leukaemia                                                                                                                                                                                                                                                                                                                                                                                                                                                                                                                                                                       |
|                                 |                                                                                                                                                                                                                                                                                                                                                                                                                                                                                                                                                                                                                                                                        |

SCHOLARONE™  
Manuscripts



**TITLE:**

**Are Survival and Mortality Rates Associated with Recruitment to Clinical Trials in Teenage and Young Adult Patients with Acute Lymphoblastic Leukaemia?**

**RUNNING TITLE:**

Impact of Trial Recruitment in TYA ALL

**AUTHORS:**

Rachael Hough University College Hospital, 250 Euston Road, London. NW1 2PG. UK

Sabrina Sandhu National Cancer Registration and Analysis Service, Public Health England, Wellington House, 133-155 Waterloo Road, London. SE1 8UG. UK

Maria Khan National Cancer Registration and Analysis Service, Public Health England, Wellington House, 133-155 Waterloo Road, London. SE1 8UG. UK

Anthony Moran National Cancer Registration and Analysis Service, Public Health England, Wellington House, 133-155 Waterloo Road, London. SE1 8UG. UK

Richard Feltbower Division of Epidemiology & Biostatistics, School of Medicine, University of Leeds, Leeds, LS2 9JT, UK

Charles Stiller National Cancer Registration and Analysis Service, Public Health England, Old Road Campus Research Building, Roosevelt Drive, Oxford, OX3 7DQ UK

Mike CG Stevens University of Bristol, Tyndall Avenue, Bristol. BS8 1TH. UK

Clare Rowntree University Hospital of Wales, Heath Park, Cardiff. CF14 4XW. UK

Ajay Vora Sheffield Children's Hospital, Western Bank, Sheffield. S10 2TH. UK

Martin G McCabe Division of Molecular and Clinical Cancer Sciences, University of Manchester, Manchester Academic Health Science Centre, Grafton Street, Manchester. M13 9NT. UK

**CORRESPONDENCE:**

Dr Rachael Hough

Department of Haematology University College Hospital, London, NW1 2PG UK

Tel: 00447711157526

Fax: 00442034479064

e-mail: [rachael.hough@uclh.nhs.uk](mailto:rachael.hough@uclh.nhs.uk)

For peer review only

**ABSTRACT****Objective**

Participation rates in clinical trials are low in teenagers and young adults (TYA) with cancer.

Whilst the importance of clinical trials in informing best practice is well established, data regarding individual patient benefit are scarce. We have investigated the association between overall survival and trial recruitment in TYA patients with acute lymphoblastic leukaemia (ALL).

**Design**

Retrospective

**Setting**

National (England) TYA patients treated for ALL

**Participants**

511 patients aged 15-24 years diagnosed with ALL between 2004 to 2010 inclusive, of whom 239 (46.7%) participated in the UKALL2003 trial.

**Outcome Measures**

Patients were identified using National Clinical Trial (UKALL2003) and Cancer Registry (National Cancer Data Repository, English National Cancer Online Registration Environment) Databases. Relative survival rates were calculated for trial and non-trial patients and observed differences were modelled using a multiple regression approach. The numbers and percentages of deaths in those patients included in the survival analysis were determined for each three-month period, P values were calculated using the two-tailed z-test for difference between proportions and 95% confidence intervals for percentage deaths were derived using the Binomial distribution based on the Wilson Score method.

## Results

Patients treated on the trial had a 17.9% better two-year survival (85.4% vs 67.5%,  $p < 0.001$ ) and 8.9% better one-year survival (90.8% vs 81.9%,  $p = 0.004$ ) than those not on the trial. 35 (14.6%) patients recruited to the trial died in the two years following diagnosis compared with 86 (32.6%) of those not recruited ( $p < 0.001$ ).

## Conclusions

TYA patients recruited to the clinical trial UKALL 2003 in England had a lower risk of mortality and a higher overall survival than contemporaneous non-trial patients. These data underline the potential for individual patient benefit in joining a clinical trial and the importance of international efforts to increase trial participation in the TYA age group.

## STRENGTHS AND LIMITATIONS OF THIS STUDY

The study asks a fundamental question regarding the value to an individual of recruitment to a clinical trial

Large sample size including all TYA patients aged 15-24 years diagnosed with ALL in England between 2004-2010

This retrospective study is possible because a) the consent process for UKALL2003 included explicit consent for the trial data to be shared with regional and national cancer registries, and b) because the UK has full population coverage for cancer registration

Potential confounding variables include selection bias, centre effect and recruitment to other clinical trials

1  
2  
3  
4  
5  
6  
7  
8  
9  
10  
11  
12  
13  
14  
15  
16  
17  
18  
19  
20  
21  
22  
23  
24  
25  
26  
27  
28  
29  
30  
31  
32  
33  
34  
35  
36  
37  
38  
39  
40  
41  
42  
43  
44  
45  
46  
47  
48  
49  
50  
51  
52  
53  
54  
55  
56  
57  
58  
59  
60

**FUNDING**

This research received no specific grant from any funding agency in the public, commercial or not-for-profit sectors.

For peer review only

## INTRODUCTION

Although survival rates in teenage and young adult (TYA) patients with cancer have improved over the last two decades [1], these outcome gains have been modest and cancer remains the leading cause of non-accidental mortality in the TYA age group [2, 3].

The barriers to improving survival are likely to be multifactorial and include sub-optimal diagnostic pathways, complex tumour and host biology, access to age or site specific specialist care and poor compliance with treatment [4, 5]. Importantly, recruitment rates to clinical trials in TYA cancer patients are the lowest of any age group [5-8]. In those patients for whom clinical trials are available, factors influencing participation include whether the treating physician is from a paediatric or adult background [5, 9-12], the type of treating centre (academic, tertiary or other)[9], and patient factors, notably the acceptability to and attitudes of TYA patients [13]. In addition, there are often fewer clinical trials available to TYA patients than to younger or older cancer patients [7, 8, 14], reflecting the unique distribution of tumours in this age group and the traditional separation between adult and paediatric clinical research programmes [5].

Whilst sequential clinical trials clearly inform evidence based best practice in cancer therapy and have improved outcomes in specific disease types [15], the value of participation for an individual patient is less clear. The benefits may include access to a superior therapy not otherwise available, enhanced quality of care, access to a broader team of specialised professionals [16] and stricter adherence to trial mandated treatment. However, to date,

1  
2  
3 no study has demonstrated a survival advantage specifically associated with trial  
4  
5 participation in TYA patients [17, 18].  
6  
7  
8  
9

10 Here, we report survival outcomes of TYA patients with acute lymphoblastic leukaemia (ALL)  
11  
12 in England who were treated within or outside of the national clinical trial, UKALL2003.  
13  
14

## 15 16 17 **METHODS** 18 19

### 20 21 **UKALL2003** 22

23 UKALL2003 was the UK clinical trial of minimal residual disease (MRD)-directed  
24  
25 chemotherapy for Philadelphia chromosome negative ALL in children and young people  
26  
27 aged 1 to 24 years, which opened in 2003 and closed in 2011. The maximum age for trial  
28  
29 entry was the 18<sup>th</sup> birthday when the trial began, but was increased to the 20<sup>th</sup> birthday in  
30  
31 2006 and the 25<sup>th</sup> birthday in 2007. Details of the protocol and outcomes of the trial have  
32  
33 been published previously [19-21]. The consent form for UKALL2003 included explicit  
34  
35 consent for data sharing with national cancer registries. Patients with Philadelphia  
36  
37 chromosome positive ALL were eligible for post induction recruitment to the ESPHALL trial if  
38  
39 aged less than 18 years (until 2009) or UKALL XII if aged 18 years or older (until 2006). The  
40  
41 lower age limit for recruitment of patients with Philadelphia negative ALL to UKALL XII was  
42  
43 sequentially increased according to the change in the upper age limit for UKALL2003 to  
44  
45 avoid overlapping age eligibility for the two trials. These changes to age eligibility for  
46  
47 UKALL2003 and UKALL XII were communicated in newsletters circulated by the clinical trials  
48  
49 unit and presented at both paediatric and adult annual national leukaemia trials update  
50  
51  
52  
53  
54  
55  
56  
57  
58  
59  
60

1  
2  
3 meetings. The National Institute for Health Research also hosts a trial database, which  
4  
5 summarised all of these trials and was searchable by any clinician.  
6  
7  
8

### 9 10 **Study Population**

11  
12 The study population for this analysis was defined as any patient diagnosed with ALL in  
13  
14 2004-2010 (the 7 complete years during which UKALL2003 was recruiting), aged 15-24 years  
15  
16 and resident in England at the time of diagnosis. The diagnosis reported to the registry and  
17  
18 trial was made in the laboratories of treating centre, without central verification. Details  
19  
20 were obtained on the 337 TYA patients who took part in the UKALL2003 Trial including  
21  
22 name, date of birth and hospital of treatment, but not address or country of residence.  
23  
24 Details of missing NHS numbers on UKALL2003 were obtained using the NHS Strategic  
25  
26 Tracing Service (NSTS), which contains details of all individuals registered with a GP in  
27  
28 England or Wales. The National Cancer Data Repository (NCDR) was the database used to  
29  
30 undertake cancer analyses at the time this study commenced. It included details of all  
31  
32 patients diagnosed with cancer who were resident in England. A frozen copy of NCDR was  
33  
34 compiled from the eight regional registries then in existence, when cancer data for a given  
35  
36 calendar year were considered to be near complete – a process which took considerable  
37  
38 time. The version used in this study was that produced when 2010 data were considered  
39  
40 complete. The patients in UKALL2003 were matched against those on the NCDR database  
41  
42 who were diagnosed in 2004-2010 aged 15-24 with any cancer. Patients recorded on NCDR  
43  
44 as having ALL and who were not on the UKALL database were included in our study as the  
45  
46 non-trial arm.  
47  
48  
49  
50  
51  
52  
53  
54  
55  
56  
57  
58  
59  
60



1  
2  
3 The move to a single cancer registry for England, which was completed while this study was  
4  
5 underway, resulted in the production of the English National Cancer Online Registration  
6  
7 Environment (ENCORE). This is a live database, which is updated regularly. It is used by  
8  
9 registry staff to determine if a given patient has already been registered. It contains details  
10  
11 of all residents of England who have been diagnosed with cancer, including patients  
12  
13 reported to the National Cancer Registration and Analysis Service (NCRAS) but with  
14  
15 insufficient details to be counted as a case of cancer; these are called provisional  
16  
17 registrations and are upgraded to full registrations when further details are obtained.  
18  
19 ENCORE also contains details of cancer patients managed at a hospital in England but  
20  
21 resident elsewhere. Patients on the UKALL database not found on NCDR were manually  
22  
23 checked on ENCORE, in order to determine the reasons why these patients were not on  
24  
25 NCDR and to identify any patients reported to NCRAS after the NCDR was compiled. Those  
26  
27 whose records were found on ENCORE and who fulfilled the study definition were added to  
28  
29 patients on both UKALL and NCDR to make up the trial arm in our study.  
30  
31  
32  
33  
34  
35  
36  
37  
38  
39  
40  
41  
42  
43  
44  
45  
46  
47

48  
49  
50  
51  
52  
53  
54  
55  
56  
57  
58  
59  
60

Details of patients on the UKALL database but not found on ENCORE were checked against the NSTS to determine whether living in England or Wales. The UKALL database was interrogated for the country of the treating hospital for those patients not found on NSTS.

### Consent

Registry data was routinely submitted to the national cancer registry under legal permissions that were initially included under Section 60 of the Health and Social Care Act 2001 and more recently Section 251 of the NHS Act 2006. This permission is renewed

1  
2  
3 annually. Identifiable trial data were shared with explicit patient consent obtained during  
4  
5 trial registration.  
6  
7  
8  
9

## 10 11 12 **Analyses**

13  
14 We determined the number and percentage of patients who participated in UKALL2003 by  
15  
16 year of diagnosis and age group. Survival rates were calculated for patients in the trial and  
17  
18 not in the trial, excluding patients on whom the only available data were from death  
19  
20 certificates – death certificate only (DCO) registrations. Death details were obtained from  
21  
22 NCDR up to the end of 2012, with follow-up starting from the date of diagnosis recorded on  
23  
24 NCDR; the equivalent data were obtained from ENCORE for those patients not found on  
25  
26 NCDR. One-year, two-year and two-year conditional on one-year relative survival rates  
27  
28 were calculated for 15-24, 15-19 and 20-24 year olds for trial and non-trial patients.  
29  
30 Relative survival was estimated from life tables stratified by age, sex and time using the  
31  
32 Stata strsr programme [22]. Expected survival was estimated using the Ederer II method.  
33  
34  
35  
36  
37  
38  
39

40 Differences in relative survival were modelled using a multiple regression approach based  
41  
42 on generalised linear models, assuming a Poisson distribution for the observed number of  
43  
44 deaths [23]. Differences were considered statistically significant if two-sided P values were  
45  
46 <0.05. All statistical analyses were conducted using Stata version 13.  
47  
48  
49

50  
51  
52 The numbers of deaths in those patients included in the survival analysis were determined  
53  
54 for each three-month period during the two years of follow-up and percentages calculated  
55  
56 based on the number of patients alive at the beginning of each three-month period. P  
57  
58  
59  
60

1  
2  
3 values were calculated using the two-tailed z-test for difference between proportions. 95%  
4  
5 confidence intervals for percentage deaths were derived using the Binomial distribution  
6  
7 based on the Wilson Score method [24].  
8  
9

### 10 11 12 **Completion of TYAC form** 13

14  
15 During 2009 and 2010, enhanced cancer registration forms were in use throughout the  
16  
17 English TYA Principal Treatment Centres (PTCs). The forms were developed by the  
18  
19 professional organisation Teenagers and Young Adults with Cancer (TYAC)  
20  
21 (<http://www.tyac.org.uk>) and were collected and matched with registry data by the lead UK  
22  
23 regional registry for TYA cancer at the time, the North West Cancer Intelligence Service  
24  
25 (now part of Public Health England). Receipt of a TYAC form by the registry was used as a  
26  
27 proxy that the patient's management had been provided by or at least discussed with the  
28  
29 regional TYA PTC. We calculated the percentage of patients in the trial for whom a TYAC  
30  
31 form was completed to explore the relationship between access to TYA specialist services  
32  
33 and participation in the trial.  
34  
35  
36  
37  
38  
39  
40  
41  
42  
43  
44  
45  
46  
47  
48  
49  
50  
51  
52  
53  
54  
55  
56  
57  
58  
59  
60

## RESULTS

### Study population

The process by which the study population was selected is shown in Figure 1. Details on 227 of the 337 patients on the UKALL database were found on NCDR; twenty of whom had a diagnosis other than ALL on NCDR. The most common diagnoses were leukaemia (5), acute leukaemia (4), acute myeloid leukaemia (4) and Non-Hodgkin lymphoma (4). 272 patients with a diagnosis of ALL on NCDR were not on the UKALL database and these constituted the non-trial arm of this study.

Of the 110 patients on UKALL2003 not found on NCDR, 43 were identified on ENCORE. 31 did not fulfil the study definition for the following reasons:

- (a) 26 were diagnosed in 2011
- (b) One diagnosed in 2003
- (c) One aged 14 at time of diagnosis
- (d) One treated in England but not a resident
- (e) Two were provisional registrations that were not confirmed

The twelve patients who fulfilled the study definition had been reported to the NCRAS after the NCDR was compiled. These patients were added to the 227 found on both the UKALL2003 and NCDR databases to make up the trial arm of this study.

Of the 67 patients on the UKALL2003 database not found on ENCORE, 60 were not resident in England confirmed by having a non-English address on NSTS and/or the treating hospital

1  
2  
3 recorded on UKALL2003 as being outside England. The remaining seven patients, who did  
4  
5 fulfil the study definition, were excluded for a number of reasons, including not being  
6  
7 reported to the registry by the treating hospital or insufficient details provided to allow a  
8  
9 full registration, and inaccurate personal details on the UKALL2003 database resulting in  
10  
11 patients not being found on ENCORE.  
12  
13

### 14 15 16 17 **Participation in UKALL2003**

18  
19 A total of 511 patients aged 15-24 years were included in the analyses, of whom 239  
20  
21 (47.5%) had participated in UKALL2003 (Table 1a). The overall number of 20-24 year old  
22  
23 patients recruited (36 patients) was lower than 18-19 year olds (54 patients) and 15-17 year  
24  
25 olds (149 patients). In total, 203 (84.9%) of 239 trial patients were aged 15-19 years. Trial  
26  
27 participation improved over time, from 59.3% in 2004-2007 to 76.7% in 2008-2010 ( $p =$   
28  
29 0.007) in the 15-17 year old group (the only group eligible for the trial for the entire study  
30  
31 period)(Table 1b). It is likely that the sequential changes in age eligibility criteria for  
32  
33 UKALL2003 were partly responsible for low recruitment numbers in the older age groups.  
34  
35 However, for the period 2008-2010, during which all 15-24 year olds were eligible for the  
36  
37 study, participation remained higher in younger patients: 76.3% of 15-19 year olds  
38  
39 compared with 45.1% of 20-24 year olds ( $p < 0.001$ ).  
40  
41  
42  
43  
44  
45  
46  
47

### 48 **Recruitment to Other Clinical Trials**

49  
50 Since the trial consent forms for ESPHALL and UKALLXII did not include explicit consent for  
51  
52 data sharing with the national registries, it was not possible to access detailed information  
53  
54 from these trial databases. However, the overall number of UK patients recruited to these  
55  
56 trials within the study period included 3 patients aged 15-17 years recruited to ESPHALL and  
57  
58  
59  
60

1  
2  
3 100 patients aged 15-24 years recruited to UKALL XII. Although ESPHALL recruited only  
4  
5 those with Philadelphia chromosome positive disease, UKALL XII recruited both Philadelphia  
6  
7 chromosome positive and negative ALL patients. Given the sequential increase in the lower  
8  
9 age limit for UKALL XII for Philadelphia chromosome negative ALL was sequentially  
10  
11 increased over time, the highest proportion of patients recruited to UKALL XII would be  
12  
13 those with Philadelphia chromosome negative disease in the older age group..  
14  
15  
16  
17  
18  
19  
20  
21

## 22 **Survival**

23  
24 503 patients were included in the survival analysis: 239 in the trial arm and 264 in the non-  
25  
26 trial arm. Patients aged 15-24 years recruited to the UKALL2003 trial had 17.9% better two-  
27  
28 year survival (85.4% vs 67.5%,  $p < 0.001$ ), 8.9% better one-year survival (90.8% vs 81.9%,  $p =$   
29  
30 0.004) and 11.6% better two-year survival conditional on one-year survival (94.1% vs 82.5%,  
31  
32  $p = 0.001$ ) compared to non-trial patients (Table 2, Figure 2). To determine whether the  
33  
34 effects of trial recruitment on survival were measurable across the age cohort we analysed  
35  
36 15-19 year olds and 20-24 year olds separately. The differences in survival at all time points  
37  
38 remained significant in the 15-19 year old age group (Table 2). Two-year and conditional  
39  
40 two-year survival showed a non-significant trend to better in trial patients than non-trial  
41  
42 patients in the 20-24 year old cohort. The results for 2008-10 (after closure of UKALLXII) are  
43  
44 similar to those for the whole study period: 20-24 year olds in the trial had a two-year  
45  
46 survival 10.2% better than those not in the trial, but this did not reach statistical significance  $p$   
47  
48 = 0.393.  
49  
50  
51  
52  
53  
54  
55  
56  
57  
58  
59  
60

1  
2  
3 To determine whether the deaths were evenly spaced after diagnosis we next analysed the  
4  
5 number of deaths in trial and non-trial patients by quarter-year from diagnosis. Table 3  
6  
7 shows the number and percentage of deaths by trial status for each quarter-year and year  
8  
9 of follow-up. A total of 35 (14.6%) trial patients died in the two years following diagnosis  
10  
11 compared with 86 (32.6%) of non-trial patients ( $p < 0.001$ ). The difference in the proportion  
12  
13 of deaths between trial and non-trial patients was 9% (18.2% - 9.2%;  $p = 0.004$ ) fewer  
14  
15 deaths in trial patients during the first year and 11.6% (17.6% - 6.0%;  $p < 0.001$ ) during the  
16  
17 second. However, the largest number of deaths overall and the largest difference between  
18  
19 trial and non-trial patients for any quarter was in the first three months after diagnosis: 6  
20  
21 (2.5%) trial patients died compared with 21 (8.0%) non-trial patients ( $p = 0.007$ ).  
22  
23  
24  
25  
26  
27  
28

### 29 **Exploratory analysis of trial recruitment by place of care**

30  
31 The data available in national registry records were not sufficient to allow us to determine  
32  
33 the reasons for non-recruitment of non-trial patients, how non-trial patients were treated  
34  
35 or the training background of treating physicians (paediatric, TYA or adult). However, we  
36  
37 were able to compare trial recruitment rates between patients for whom an enhanced TYAC  
38  
39 cancer registration form had been submitted and those with no TYAC form. The trial  
40  
41 recruitment rates were significantly different between the two groups: 73.5% of patients  
42  
43 with a submitted TYAC form were recruited compared to 51.9% of those for whom a form  
44  
45 was not submitted ( $p = 0.001$ , Table 4). The difference was highest among patients aged 20-  
46  
47 24 years (61.5% trial recruitment among patients with associated TYAC forms versus 36.4%  
48  
49 without). Patients for whom a TYAC form was submitted had a two-year survival of 80.8%  
50  
51 compared with 82.8% for those without a form ( $p = 0.771$ ).  
52  
53  
54  
55  
56  
57  
58  
59  
60

## DISCUSSION

By combining trial and national cancer registry data we have demonstrated a significant survival advantage to participation in the most recently completed, large prospective clinical trial for TYA patients with ALL, which is measurable at a population level. This is the first study to have demonstrated such a survival advantage in any cancer type in the TYA age group. The difference in survival was highly significant, with a 17.9% superior survival at two years in trial patients compared to non-trial patients. The risk of mortality at 2 years in those treated outside of the trial was twice that of those on UKALL2003 (32.6% compared to 14.6%,  $p < 0.001$ ) and was most striking during the first 3 months after diagnosis (8.0% compared to 2.5%,  $p = 0.007$ ).

This retrospective analysis of the impact of clinical trial recruitment on survival was possible because the consent process for UKALL2003 included explicit consent for the trial data to be shared with regional and national cancer registries, and because the UK has full population coverage for cancer registration. This study, however, did show a number of limitations of the cancer registration system for England during the period 2004-2010 including a) Accuracy of diagnosis: twenty patients on UKALL2003 with a diagnosis other than ALL on NCDR and b) Timeliness: twelve patients on ENCORE but not on NCDR. In addition, the main source of diagnostic data for cancer registries during the study period was histopathology laboratories, leading to difficulties in obtaining high quality data on patients with ALL. In addition, there were no data available for the well-established prognostic variables in ALL, thus precluding comparison of the frequency of different risk groups between those treated on or off trial. Data were collected by regional registries and then compiled into a national



1  
2  
3 database, which took considerable time. Public Health England (PHE) has made many  
4  
5 improvements since taking over the NCRAS a few years ago including a) Moving to a single,  
6  
7 completely integrated national registry, b) Setting up systems that report in real time from a  
8  
9 wide variety of sources, such as MDTs, leading to more timely and accurate data and c)  
10  
11 Reviewing access to specialist haematological diagnostic datasets to improve the data  
12  
13 quality of haematological cancers and d) Producing an analysis database that is constantly  
14  
15 kept up to date.  
16  
17  
18  
19

20  
21 We also recognise a number of potential confounding variables in this study. Potential  
22  
23 confounders which could increase the observed difference between those on trial compared  
24  
25 to those treated off trial include centre effect, selection bias and use of a superior protocol,  
26  
27 and those reducing the difference include recruitment to other ALL clinical trials.  
28  
29  
30  
31

32  
33 Any potential benefit to participation of young people in clinical trials may be derived from  
34  
35 the treating centre rather than trial participation itself (centre effect). Centres offering  
36  
37 clinical trials are often larger, academic institutions, seeing a higher number of patients with  
38  
39 a specific disease, a larger clinical research infrastructure and a more resourced workforce,  
40  
41 all of which may contribute to a more favourable outcome [16]. Over the last 10 years there  
42  
43 has been a gradual reconfiguration of services providing care for young people aged 16-24  
44  
45 years with cancer in the UK; this includes the development of Principal Treatment Centres,  
46  
47 designated of other hospitals offering TYA services closer to the patients' homes and an  
48  
49 overview of the holistic care of all patients provided by the TYA multidisciplinary team  
50  
51 (MDT). Between 2004 to 2010, these pathways were not fully established, but the  
52  
53 submission of TYAC enhanced cancer registration forms have been used as a surrogate  
54  
55  
56  
57  
58  
59  
60

1  
2  
3 indicator that an individual patient received treatment according to regionally agreed and  
4  
5 commissioned TYA pathways under the supervision of the TYA PTC. It is therefore  
6  
7 interesting to note that a significantly higher proportion of patients recruited onto  
8  
9 UKALL2003 had been registered centrally via the TYAC notification system than non-trial  
10  
11 patients (73.5% with a TYAC form compared to 51.9% without,  $p=0.001$ ). This was  
12  
13 particularly marked in the older age group. However, the finding that two-year survival was  
14  
15 not higher in those patients with a submitted TYAC form does not support the argument  
16  
17 that the better survival for those in the trial was mainly due to having been managed at  
18  
19 larger centres.  
20  
21  
22  
23  
24  
25

26  
27 Whilst selection bias, in which the highest risk patients (eg those with a very high white  
28  
29 count, renal or hepatic impairment or large mediastinal mass at presentation) could not  
30  
31 participate in the trial, may be a confounder it is unlikely to have had a significant impact on  
32  
33 our results as a) UKALL2003 was a population-based trial for which all children and young  
34  
35 people with ALL were eligible, irrespective of severity or risk group at presentation and b) it  
36  
37 also permitted recruitment within 7 days of commencement of chemotherapy. Patients  
38  
39 with Philadelphia chromosome positive (Ph+ve) ALL were ineligible for UKALL2003 , but  
40  
41 Ph+ve patients were included in the non-trial arm, as NCDR did not include details of Ph  
42  
43 chromosome status . The presence of the Philadelphia chromosome in ALL confers a poorer  
44  
45 prognosis [25] and could therefore increase the survival difference observed in this study.  
46  
47  
48 However we feel that this is unlikely to have been a significant confounding variable since  
49  
50 the prevalence of Ph+ve ALL in UKALL2003 overall was only 1.8% and the observed  
51  
52 difference between groups was non-significant in the older patients despite the frequency  
53  
54 of the Philadelphia chromosome increasing with increasing age.  
55  
56  
57  
58  
59  
60

1  
2  
3  
4  
5 During the study period, TYA patients with Ph+ve disease were eligible for the ESPHALL or  
6  
7 UKALLXII (until 2006) trials, depending on age, and older patients with Ph-ve disease were  
8  
9 eligible for recruitment onto UKALLXII (lower age limit 18<sup>th</sup> birthday from 2004, 20<sup>th</sup> birthday  
10  
11 from 2006 and 25<sup>th</sup> birthday from 2007). Whilst we do not know the proportions of non-  
12  
13 UKALL2003 patients recruited to these trials, if trial participation in itself confers a survival  
14  
15 advantage, recruitment of patients to these other clinical trials would be expected to reduce  
16  
17 observed differences between our two study groups, reduce any residual confounding from  
18  
19 the exclusion of Ph+ve patients from UKALL2003 and may have also contributed to the non-  
20  
21 significant difference in survival between trial and non-trial patients in the 20-24 year old  
22  
23 group. This is further supported by the observation that only 3 UK patients aged 15-17  
24  
25 years were recruited to ESPHALL (Ph+ve ALL only), but 100 patients aged 16-24 years were  
26  
27 recruited to UKALLXII (Ph+ve and -ve ALL). The relative contribution of treatment protocol  
28  
29 on outcome differences was impossible to assess in this study, since the registry dataset did  
30  
31 not include which specific regimen was used.  
32  
33  
34  
35  
36  
37  
38  
39  
40

41 Recruitment to clinical trials in TYA cancer patients is poor due to a range of factors  
42  
43 including lack of an available trial, heterogenous referral pathways, differences in treating  
44  
45 centres as well as lack of desire to participate by this age group [4, 9, 13, 26]. Overall,  
46  
47 approximately 50% of TYA patients in England with ALL participated in UKALL2003.  
48  
49

50 Although this figure is lower than the proportion of younger children who participated in  
51  
52 the trial, it compares favourably to other cancer trials reported in this age group; in the UK  
53  
54 between 2005 to 2010, only 850 of 2860 patients aged 15–19 years (30%), and 562 of 4011  
55  
56 patients aged 20–24 years (14%) were recruited to a clinical trial [4]. Encouragingly,  
57  
58  
59  
60

1  
2  
3 recruitment to UKALL2003 improved over time. In part, this was expected in the 18-24 year  
4  
5 old group, given the sequential increase in age eligibility criteria over time. However, even  
6  
7 in the 15-17 year old patients who were eligible for participation throughout the study  
8  
9 period, participation increased from 59.3% in 2004-2007 to 76.7% in 2008-2010 ( $p = 0.007$ ).  
10  
11 Despite this, there were still a substantial number of young people who did not participate,  
12  
13 particularly amongst 20-24 year olds, where participation was only 45.1%. Fern et al  
14  
15 propose that there are five factors (five "A's") important in improving TYA cancer trial  
16  
17 recruitment; available, accessible, aware, appropriate, and acceptable. The relatively high  
18  
19 level of recruitment of TYA ALL patients to UKALL2003 and its improvement over time  
20  
21 probably reflects an increasing awareness (as a result of newsletters and the trial  
22  
23 coordinators presenting at a series of national meetings) and acceptability amongst  
24  
25 paediatric and adult haematologists that UKALL2003 offered an effective (i.e. appropriate)  
26  
27 treatment strategy, with increasing availability and accessibility as the age range was  
28  
29 increased and a greater number of adult centres opened the trial.  
30  
31  
32  
33  
34  
35  
36  
37  
38  
39  
40  
41  
42  
43  
44  
45  
46  
47  
48  
49  
50  
51  
52  
53  
54  
55  
56  
57  
58  
59  
60

In conclusion, we report a specific survival advantage to participation in the UKALL2003 trial  
for TYA patients with ALL. This is the first study to have demonstrated a survival advantage  
of trial participation in TYA patients with any cancer and suggests a benefit to an individual  
patient in taking part. These data highlight the importance of national and international  
efforts to a) improve recruitment of TYA cancer patients to clinical trials, b) configure TYA  
cancer services to provide young people with access to appropriate trials and the  
opportunity to participate and c) the need to continue to collect accurate treatment and  
outcome data at a population level to allow evaluation of treatment in patients who have  
not accessed clinical trials. In England these duties are the responsibilities respectively of

1  
2  
3  
4  
5  
6  
7  
8  
9  
10  
11  
12  
13  
14  
15  
16  
17  
18  
19  
20  
21  
22  
23  
24  
25  
26  
27  
28  
29  
30  
31  
32  
33  
34  
35  
36  
37  
38  
39  
40  
41  
42  
43  
44  
45  
46  
47  
48  
49  
50  
51  
52  
53  
54  
55  
56  
57  
58  
59  
60

the National Cancer Research Institute, NHS England and Public Health England, working together towards the goal of best patient outcomes. The data we present suggest that significant improvements in the delivery of appropriate cancer treatment are still much needed for this vulnerable young population.

For peer review only

## ACKNOWLEDGEMENTS AND AUTHOR CONTRIBUTIONS

Patients, families and clinicians participating in UKALL2003

Regional and institutional data managers

The study was designed by RH, AM, SS, MK, RF, CS and MMC. RH, CR and AV designed, recruited to and analysed data for the UKALL2003 study. The statistical analysis of this study was performed by SS, MK, AM and MMC. All authors contributed to the interpretation of data and preparation of the manuscript and approve this final version.

## COMPETING INTERESTS STATEMENT

We have read and understood BMJ policy on declaration of interests and declare that we have no competing interests.

## DATA SHARING STATEMENT

There are no additional unpublished data from this study

## REFERENCES

1. O'Hara, C., et al., *Trends in survival for teenagers and young adults with cancer in the UK 1992-2006*. Eur J Cancer, 2015. **51**(14): p. 2039-48.
2. Barr, R.D., *Adolescents, young adults, and cancer--the international challenge*. Cancer, 2011. **117**(10 Suppl): p. 2245-9.
3. Meadows, A.T., *Pediatric cancer survivors: Past history and future challenges*. Curr Probl Cancer, 2003. **27**(3): p. 112-26.
4. Fern, L.A., et al., *Available, accessible, aware, appropriate, and acceptable: a strategy to improve participation of teenagers and young adults in cancer trials*. Lancet Oncol, 2014. **15**(8): p. e341-50.
5. Burke, M.E., K. Albritton, and N. Marina, *Challenges in the recruitment of adolescents and young adults to cancer clinical trials*. Cancer, 2007. **110**(11): p. 2385-93.
6. Bleyer, W.A., et al., *National cancer clinical trials: children have equal access; adolescents do not*. J Adolesc Health, 1997. **21**(6): p. 366-73.
7. Krailo, M.D., et al., *Patterns of enrollment on cooperative group studies. An analysis of trends from the Los Angeles County Cancer Surveillance Program*. Cancer, 1993. **71**(10 Suppl): p. 3325-30.
8. Fern, L., et al., *Rates of inclusion of teenagers and young adults in England into National Cancer Research Network clinical trials: report from the National Cancer Research Institute (NCRI) Teenage and Young Adult Clinical Studies Development Group*. Br J Cancer, 2008. **99**(12): p. 1967-74.
9. Tai, E., et al., *Treatment setting, clinical trial enrollment, and subsequent outcomes among adolescents with cancer: a literature review*. Pediatrics, 2014. **133** Suppl 3: p. S91-7.
10. Parsons, H.M., et al., *Clinical trial participation and time to treatment among adolescents and young adults with cancer: does age at diagnosis or insurance make a difference?* J Clin Oncol, 2011. **29**(30): p. 4045-53.
11. Downs-Canner, S. and P.H. Shaw, *A comparison of clinical trial enrollment between adolescent and young adult (AYA) oncology patients treated at affiliated adult and pediatric oncology centers*. J Pediatr Hematol Oncol, 2009. **31**(12): p. 927-9.
12. Mitchell, A.E., et al., *Cancer in adolescents and young adults: treatment and outcome in Victoria*. Med J Aust, 2004. **180**(2): p. 59-62.
13. Grigsby, T.J., et al., *Attitudes Toward Cancer Clinical Trial Participation in Young Adults with a History of Cancer and a Healthy College Student Sample: A Preliminary Investigation*. J Adolesc Young Adult Oncol, 2014. **3**(1): p. 20-27.
14. Shaw, P.H. and A.K. Ritchey, *Different rates of clinical trial enrollment between adolescents and young adults aged 15 to 22 years old and children under 15 years old with cancer at a children's hospital*. J Pediatr Hematol Oncol, 2007. **29**(12): p. 811-4.
15. Stiller, C.A. and E.M. Eatock, *Patterns of care and survival for children with acute lymphoblastic leukaemia diagnosed between 1980 and 1994*. Arch Dis Child, 1999. **81**(3): p. 202-8.
16. Ferrari, A. and A. Bleyer, *Participation of adolescents with cancer in clinical trials*. Cancer Treat Rev, 2007. **33**(7): p. 603-8.

17. Kumar, A., et al., *Are experimental treatments for cancer in children superior to established treatments? Observational study of randomised controlled trials by the Children's Oncology Group*. BMJ, 2005. **331**(7528): p. 1295.
18. Peppercorn, J.M., et al., *Comparison of outcomes in cancer patients treated within and outside clinical trials: conceptual framework and structured review*. Lancet, 2004. **363**(9405): p. 263-70.
19. Vora, A., et al., *Augmented post-remission therapy for a minimal residual disease-defined high-risk subgroup of children and young people with clinical standard-risk and intermediate-risk acute lymphoblastic leukaemia (UKALL 2003): a randomised controlled trial*. Lancet Oncol, 2014. **15**(8): p. 809-18.
20. Vora, A., et al., *Treatment reduction for children and young adults with low-risk acute lymphoblastic leukaemia defined by minimal residual disease (UKALL 2003): a randomised controlled trial*. Lancet Oncol, 2013. **14**(3): p. 199-209.
21. Hough, R., et al., *Efficacy and toxicity of a paediatric protocol in teenagers and young adults with Philadelphia chromosome negative acute lymphoblastic leukaemia: results from UKALL 2003*. Br J Haematol, 2016. **172**(3): p. 439-51.
22. Dickman, P.W., et al., *Estimating net survival in population-based cancer studies*. Int J Cancer, 2013. **133**(2): p. 519-21.
23. Dickman, P.W., et al., *Regression models for relative survival*. Stat Med, 2004. **23**(1): p. 51-64.
24. Observatories, A.o.P.H., 1. *APHO. Technical Briefing 3, Commonly Used Public Health Statistics and their Confidence Intervals* 2008.
25. Pui, C.H. and W.E. Evans, *Treatment of acute lymphoblastic leukemia*. N Engl J Med, 2006. **354**(2): p. 166-78.
26. Hendricks-Ferguson, V.L., et al., *Recruitment strategies and rates of a multi-site behavioral intervention for adolescents and young adults with cancer*. J Pediatr Health Care, 2013. **27**(6): p. 434-42.



**FIGURE AND TABLE TITLES**

**Figure 1: Study population derived from matching UKALL2003 against the National Cancer**

**Data Repository (NCDR) and ENCORE**

**Figure 2: Two-year relative survival by age group and trial status**

**Table 1: Participation in UKALL2003 by age group and year of diagnosis**

**Table 1a: All Patients**

**Table 1b: Trial Participation over time in 15-17 year olds**

**Table 2: One- and two-year survival by age group and trial status**

**Table 3: Number and percentage of patients aged 15-24 who died in the two years**

**following diagnosis, by 3 month period, year and trial status**

**Table 4: Number and percentage of patients in trial by whether a TYAC form was received**

**by age group in 2009-10**

Table 1: Participation in UKALL2003 by age group and year of diagnosis

Table 1a: All Patients

| Year of diagnosis | 15-17 years |            |           | 18-19 years |            |           | 20-24 years |            |           | 15-24 years |            |           |
|-------------------|-------------|------------|-----------|-------------|------------|-----------|-------------|------------|-----------|-------------|------------|-----------|
|                   | Proportion  | Percentage | 95% CI    |
| 2004              | 19/34       | 55.9       | 39.5-71.1 | 0/6         | 0.0        | 0.0-39.0  | 0/25        | 0.0        | 0-13.3    | 19/65       | 29.2       | 19.6-41.2 |
| 2005              | 26/45       | 57.8       | 43.3-71.0 | 0/20        | 0.0        | 0-16.1    | 0/23        | 0.0        | 0-14.3    | 26/88       | 29.5       | 21.0-39.8 |
| 2006              | 18/29       | 62.1       | 44.0-77.3 | 9/26        | 34.6       | 19.4-53.8 | 0/19        | 0.0        | 0-29.9    | 27/74       | 36.5       | 26.4-47.9 |
| 2007              | 20/32       | 62.5       | 45.3-77.1 | 8/14        | 57.1       | 32.6-78.6 | 4/32        | 12.5       | 5.0-28.1  | 32/78       | 41.0       | 30.8-52.1 |
| 2008              | 23/30       | 76.7       | 59.1-88.2 | 16/18       | 88.9       | 67.2-96.9 | 8/23        | 34.8       | 18.8-55.1 | 47/71       | 66.2       | 54.6-76.1 |
| 2009              | 24/31       | 77.4       | 60.2-88.6 | 13/20       | 65.0       | 43.3-81.9 | 10/26       | 38.5       | 22.4-57.5 | 47/77       | 61.0       | 49.9-71.2 |
| 2010              | 19/25       | 76.0       | 56.6-88.5 | 8/11        | 72.7       | 43.4-90.3 | 14/22       | 63.6       | 43.0-80.3 | 41/58       | 70.7       | 58.0-80.8 |
| 2004-07           | 83/140      | 59.3       | 51.0-67.1 | 17/66       | 25.8       | 16.7-37.4 | 4/99        | 4.0        | 1.6-9.9   | 104/305     | 34.1       | 29.0-39.6 |
| 2008-10           | 66/86       | 76.7       | 66.8-84.4 | 37/49       | 75.5       | 61.9-85.4 | 32/71       | 45.1       | 34.0-56.6 | 135/206     | 45.1       | 34.0-56.6 |
| 2004-10           | 149/226     | 65.9       | 59.5-71.8 | 54/115      | 47.0       | 38.1-56.0 | 36/170      | 21.2       | 15.7-27.9 | 239/511     | 46.8       | 42.5-51.1 |

Table 1b: Trial Participation over time in 15-17 year olds

| Year of diagnosis | Proportion | Percentage | 95% CI    | p value |
|-------------------|------------|------------|-----------|---------|
| 2004-07           | 83/140     | 59.3       | 51.0-67.1 | 0.007   |
| 2008-10           | 66/86      | 76.7       | 66.8-84.4 |         |

1  
2  
3  
4  
5  
6  
7  
8  
9  
10  
11  
12  
13  
14  
15  
16  
17  
18  
19  
20  
21  
22  
23  
24  
25  
26  
27  
28  
29  
30  
31  
32  
33  
34  
35  
36  
37  
38  
39  
40  
41  
42  
43  
44  
45  
46  
47  
48  
49

Table 2: One- and two-year survival by age group and trial status

| Trial Status                                 | Age group | Number of patients | Deaths | Survival (%) | 95% CI    | P value |
|----------------------------------------------|-----------|--------------------|--------|--------------|-----------|---------|
| <b>1-year survival</b>                       |           |                    |        |              |           |         |
| Trial                                        | 15-19     | 203                | 17     | 91.7         | 86.9-94.7 | <0.001  |
| Non-Trial                                    |           | 134                | 30     | 77.6         | 69.6-83.8 |         |
| Trial                                        | 20-24     | 36                 | 5      | 86.2         | 69.8-94.0 | 0.969   |
| Non-Trial                                    |           | 130                | 18     | 86.2         | 79.0-91.1 |         |
| Trial                                        | 15-24     | 239                | 22     | 90.8         | 86.4-93.9 | 0.004   |
| Non-Trial                                    |           | 264                | 48     | 81.9         | 76.6-86.0 |         |
| <b>2-year conditional on 1-year survival</b> |           |                    |        |              |           |         |
| Trial                                        | 15-19     | 186                | 10     | 94.7         | 90.3-97.1 | 0.008   |
| Non-Trial                                    |           | 104                | 16     | 84.7         | 76.2-90.4 |         |
| Trial                                        | 20-24     | 31                 | 3      | 90.4         | 73.0-96.9 | 0.236   |
| Non-Trial                                    |           | 112                | 22     | 80.4         | 71.8-86.7 |         |
| Trial                                        | 15-24     | 217                | 13     | 94.1         | 90.0-96.6 | 0.001   |
| Non-Trial                                    |           | 216                | 38     | 82.5         | 76.7-87.0 |         |
| <b>2-year survival</b>                       |           |                    |        |              |           |         |
| Trial                                        | 15-19     | 203                | 27     | 86.8         | 81.3-90.7 | <0.001  |
| Non-Trial                                    |           | 134                | 46     | 65.7         | 57.0-73.1 |         |
| Trial                                        | 20-24     | 36                 | 8      | 77.9         | 60.5-88.3 | 0.381   |
| Non-Trial                                    |           | 130                | 40     | 69.3         | 60.6-76.5 |         |
| Trial                                        | 15-24     | 239                | 35     | 85.4         | 80.3-89.3 | <0.001  |
| Non-Trial                                    |           | 264                | 86     | 67.5         | 61.5-72.8 |         |

Table 3: Number and percentage of patients aged 15-24 who died in the two years following diagnosis, by 3 month period, year and trial status

| Year               | Quarter    | <i>In trial</i>                       |                  |        |           | <i>Not in trial</i>                   |                  |        |           | p values |
|--------------------|------------|---------------------------------------|------------------|--------|-----------|---------------------------------------|------------------|--------|-----------|----------|
|                    |            | Number of patients at start of period | Number of deaths | % Died | 95% CI    | Number of patients at start of period | Number of deaths | % Died | 95% CI    |          |
|                    | <b>1st</b> | 239                                   | 6                | 2.5    | 1.2-5.4   | 264                                   | 21               | 8.0    | 5.3-11.9  | 0.007    |
|                    | <b>2nd</b> | 233                                   | 4                | 1.7    | 0.7-4.3   | 243                                   | 5                | 2.1    | 0.9-4.7   | 0.785    |
|                    | <b>3rd</b> | 229                                   | 5                | 2.2    | 0.9-5.0   | 238                                   | 11               | 4.6    | 2.6-8.1   | 0.148    |
|                    | <b>4th</b> | 224                                   | 7                | 3.1    | 1.5-6.3   | 227                                   | 11               | 4.8    | 2.7-8.5   | 0.351    |
| <b>1st</b>         | -          | 239                                   | 22               | 9.2    | 6.2-13.5  | 264                                   | 48               | 18.2   | 14.0-23.3 | 0.004    |
|                    | <b>5th</b> | 217                                   | 2                | 0.9    | 0.3-3.3   | 216                                   | 11               | 5.1    | 2.9-8.9   | 0.011    |
|                    | <b>6th</b> | 215                                   | 4                | 1.9    | 0.7-4.7   | 205                                   | 10               | 4.9    | 2.7-8.7   | 0.0851   |
|                    | <b>7th</b> | 211                                   | 3                | 1.4    | 0.5-4.1   | 195                                   | 8                | 4.1    | 2.1-7.9   | 0.0965   |
|                    | <b>8th</b> | 208                                   | 4                | 1.9    | 0.8-4.8   | 187                                   | 9                | 4.8    | 2.6-8.9   | 0.108    |
| <b>2nd</b>         | -          | 217                                   | 13               | 6.0    | 3.5-10.0  | 216                                   | 38               | 17.6   | 13.1-23.2 | <0.001   |
| <b>1st and 2nd</b> | -          | 239                                   | 35               | 14.6   | 10.7-19.7 | 264                                   | 86               | 32.6   | 27.2-38.4 | <0.001   |

For peer review only

Table 4: Number and percentage of patients in trial by whether a TYAC form was received by age group in 2009-10

| Age          | <i>Proportion of patients with a TYAC form who were in trial</i> |            |           | <i>Proportion of patients without a TYAC form who were in trial</i> |            |           | p value |
|--------------|------------------------------------------------------------------|------------|-----------|---------------------------------------------------------------------|------------|-----------|---------|
|              | Proportion                                                       | Percentage | 95% CI    | Proportion                                                          | Percentage | 95% CI    |         |
| <b>15-19</b> | 45/57                                                            | 78.9       | 66.7-87.5 | 19/30                                                               | 63.3       | 45.5-78.1 | 0.117   |
| <b>20-24</b> | 16/26                                                            | 61.5       | 42.5-77.6 | 8/22                                                                | 36.4       | 19.7-57.0 | 0.082   |
| <b>15-24</b> | 61/83                                                            | 73.5       | 63.1-81.8 | 27/52                                                               | 51.9       | 38.7-64.9 | 0.011   |

For peer review only



Figure 1: Study population derived from matching UKALL2003 against the National Cancer Data Repository (NCDR) and ENCORE

182x212mm (300 x 300 DPI)

1  
2  
3  
4  
5  
6  
7  
8  
9  
10  
11  
12  
13  
14  
15  
16  
17  
18  
19  
20  
21  
22  
23  
24  
25  
26  
27  
28  
29  
30  
31  
32  
33  
34  
35  
36  
37  
38  
39  
40  
41  
42  
43  
44  
45  
46  
47  
48  
49  
50  
51  
52  
53  
54  
55  
56  
57  
58  
59  
60

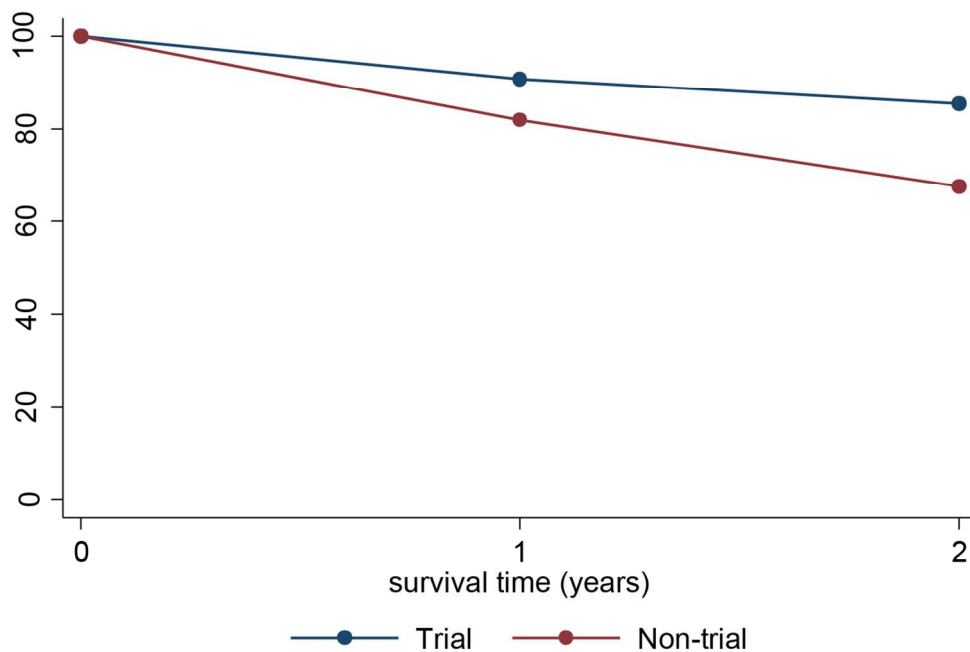

Figure 2: Two-year relative survival by age group and trial status

122x82mm (300 x 300 DPI)

view only

# BMJ Open

## Are Survival and Mortality Rates Associated with Recruitment to Clinical Trials in Teenage and Young Adult Patients with Acute Lymphoblastic Leukaemia? A Retrospective Observational Analysis in England

|                                 |                                                                                                                                                                                                                                                                                                                                                                                                                                                                                                                                                                                                                                                                        |
|---------------------------------|------------------------------------------------------------------------------------------------------------------------------------------------------------------------------------------------------------------------------------------------------------------------------------------------------------------------------------------------------------------------------------------------------------------------------------------------------------------------------------------------------------------------------------------------------------------------------------------------------------------------------------------------------------------------|
| Journal:                        | <i>BMJ Open</i>                                                                                                                                                                                                                                                                                                                                                                                                                                                                                                                                                                                                                                                        |
| Manuscript ID                   | bmjopen-2017-017052.R2                                                                                                                                                                                                                                                                                                                                                                                                                                                                                                                                                                                                                                                 |
| Article Type:                   | Research                                                                                                                                                                                                                                                                                                                                                                                                                                                                                                                                                                                                                                                               |
| Date Submitted by the Author:   | 21-Jul-2017                                                                                                                                                                                                                                                                                                                                                                                                                                                                                                                                                                                                                                                            |
| Complete List of Authors:       | Hough, Rachael; University College London Hospitals NHS Foundation Trust, Adolescent Haematology<br>Sandhu, Sabrina; National Cancer Registration and Analysis Service<br>Khan, Maria; National Cancer Registration and Analysis Service<br>Moran, Anthony; National Cancer Registration and Analysis Service<br>Feltbower, Richard<br>Stiller, Charles; National Cancer Registration and Analysis Service<br>Stevens, Mike; University of Bristol<br>Rowntree, Clare; University Hospital of Wales<br>Vora, Ajay; Great Ormond Street Hospital For Children NHS Trust<br>McCabe, Martin; University of Manchester, Division of Molecular and Clinical Cancer Sciences |
| <b>Primary Subject Heading</b>: | Haematology (incl blood transfusion)                                                                                                                                                                                                                                                                                                                                                                                                                                                                                                                                                                                                                                   |
| Secondary Subject Heading:      | Evidence based practice                                                                                                                                                                                                                                                                                                                                                                                                                                                                                                                                                                                                                                                |
| Keywords:                       | Clinical trials < THERAPEUTICS, Survival, Teenage and young adult, Acute lymphoblastic leukaemia                                                                                                                                                                                                                                                                                                                                                                                                                                                                                                                                                                       |
|                                 |                                                                                                                                                                                                                                                                                                                                                                                                                                                                                                                                                                                                                                                                        |

SCHOLARONE™  
Manuscripts



**TITLE:**

**Are Survival and Mortality Rates Associated with Recruitment to Clinical Trials in Teenage and Young Adult Patients with Acute Lymphoblastic Leukaemia? A Retrospective Observational Analysis in England**

**RUNNING TITLE:**

Impact of Trial Recruitment in TYA ALL

**AUTHORS:**

Rachael Hough      University College Hospital, 250 Euston Road, London. NW1 2PG. UK

Sabrina Sandhu      National Cancer Registration and Analysis Service, Public Health England, Wellington House, 133-155 Waterloo Road, London. SE1 8UG. UK

Maria Khan      National Cancer Registration and Analysis Service, Public Health England, Wellington House, 133-155 Waterloo Road, London. SE1 8UG. UK

Anthony Moran      National Cancer Registration and Analysis Service, Public Health England, Wellington House, 133-155 Waterloo Road, London. SE1 8UG. UK

Richard Feltbower      Division of Epidemiology & Biostatistics, School of Medicine, University of Leeds, Leeds, LS2 9JT, UK

Charles Stiller      National Cancer Registration and Analysis Service, Public Health England, Old Road Campus Research Building, Roosevelt Drive, Oxford, OX3 7DQ UK

Mike CG Stevens      University of Bristol, Tyndall Avenue, Bristol. BS8 1TH. UK

Clare Rowntree      University Hospital of Wales, Heath Park, Cardiff. CF14 4XW. UK

Ajay Vora      Sheffield Children's Hospital, Western Bank, Sheffield. S10 2TH. UK

Martin G McCabe      Division of Molecular and Clinical Cancer Sciences, University of Manchester, Manchester Academic Health Science Centre, Grafton Street, Manchester. M13 9NT. UK

**CORRESPONDENCE:**

Dr Rachael Hough

Department of Haematology University College Hospital, London, NW1 2PG UK

Tel: 00447711157526

Fax: 00442034479064

e-mail: [rachael.hough@uclh.nhs.uk](mailto:rachael.hough@uclh.nhs.uk)

For peer review only

**ABSTRACT****Objective**

Participation rates in clinical trials are low in teenagers and young adults (TYA) with cancer.

Whilst the importance of clinical trials in informing best practice is well established, data regarding individual patient benefit are scarce. We have investigated the association between overall survival and trial recruitment in TYA patients with acute lymphoblastic leukaemia (ALL).

**Design**

Retrospective

**Setting**

National (England) TYA patients treated for ALL

**Participants**

511 patients aged 15-24 years diagnosed with ALL between 2004 to 2010 inclusive, of whom 239 (46.7%) participated in the UKALL2003 trial.

**Outcome Measures**

Patients were identified using National Clinical Trial (UKALL2003) and Cancer Registry (National Cancer Data Repository, English National Cancer Online Registration Environment) Databases. Relative survival rates were calculated for trial and non-trial patients and observed differences were modelled using a multiple regression approach. The numbers and percentages of deaths in those patients included in the survival analysis were determined for each three-month period, P values were calculated using the two-tailed z-test for difference between proportions and 95% confidence intervals for percentage deaths were derived using the Binomial distribution based on the Wilson Score method.

## Results

Patients treated on the trial had a 17.9% better two-year survival (85.4% vs 67.5%,  $p < 0.001$ ) and 8.9% better one-year survival (90.8% vs 81.9%,  $p = 0.004$ ) than those not on the trial. 35 (14.6%) patients recruited to the trial died in the two years following diagnosis compared with 86 (32.6%) of those not recruited ( $p < 0.001$ ).

## Conclusions

TYA patients recruited to the clinical trial UKALL 2003 in England had a lower risk of mortality and a higher overall survival than contemporaneous non-trial patients. These data underline the potential for individual patient benefit in joining a clinical trial and the importance of international efforts to increase trial participation in the TYA age group.

## STRENGTHS AND LIMITATIONS OF THIS STUDY

The study asks a fundamental question regarding the value to an individual of recruitment to a clinical trial

Large sample size including all TYA patients aged 15-24 years diagnosed with ALL in England between 2004-2010

This retrospective study is possible because a) the consent process for UKALL2003 included explicit consent for the trial data to be shared with regional and national cancer registries, and b) because the UK has full population coverage for cancer registration

Clinically significant outcomes of survival and mortality in those recruited to the clinical trial, UKALL2003, are compared to contemporaneous patients treated off trial

Given the retrospective design of this study, there is an inherent risk of potential confounding variables influencing the observations, which are fully explored in the

1  
2  
3 discussion; these include selection bias, centre effect, protocol used and recruitment to  
4  
5 other clinical trials  
6  
7  
8  
9  
10  
11  
12  
13

#### 14 **FUNDING**

15  
16  
17 This research received no specific grant from any funding agency in the public, commercial  
18  
19 or not-for-profit sectors.  
20  
21  
22  
23  
24  
25  
26  
27  
28  
29  
30  
31  
32  
33  
34  
35  
36  
37  
38  
39  
40  
41  
42  
43  
44  
45  
46  
47  
48  
49  
50  
51  
52  
53  
54  
55  
56  
57  
58  
59  
60

## INTRODUCTION

Although survival rates in teenage and young adult (TYA) patients with cancer have improved over the last two decades <sup>1</sup>, these outcome gains have been modest and cancer remains the leading cause of non-accidental mortality in the TYA age group <sup>2,3</sup>.

The barriers to improving survival are likely to be multifactorial and include sub-optimal diagnostic pathways, complex tumour and host biology, access to age or site specific specialist care and poor compliance with treatment <sup>4,5</sup>. Importantly, recruitment rates to clinical trials in TYA cancer patients are the lowest of any age group <sup>5-8</sup>. In those patients for whom clinical trials are available, factors influencing participation include whether the treating physician is from a paediatric or adult background <sup>5,9-12</sup>, the type of treating centre (academic, tertiary or other)<sup>9</sup>, and patient factors, notably the acceptability to and attitudes of TYA patients <sup>13</sup>. In addition, there are often fewer clinical trials available to TYA patients than to younger or older cancer patients <sup>7,8,14</sup>, reflecting the unique distribution of tumours in this age group and the traditional separation between adult and paediatric clinical research programmes <sup>5</sup>.

Whilst sequential clinical trials clearly inform evidence based best practice in cancer therapy and have improved outcomes in specific disease types <sup>15</sup>, the value of participation for an individual patient is less clear. The benefits may include access to a superior therapy not otherwise available, enhanced quality of care, access to a broader team of specialised professionals <sup>16</sup> and stricter adherence to trial mandated treatment. However, to date, no

1  
2  
3 study has demonstrated a survival advantage specifically associated with trial participation  
4  
5 in TYA patients<sup>17 18</sup>.  
6  
7  
8  
9

10 The objective of this study was to report survival outcomes of TYA patients with acute  
11 lymphoblastic leukaemia (ALL) in England who were treated within or outside of the  
12 national clinical trial, UKALL2003.  
13  
14  
15  
16  
17  
18  
19

## 20 **METHODS**

### 21 **UKALL2003**

22  
23  
24 UKALL2003 was the UK clinical trial of minimal residual disease (MRD)-directed  
25 chemotherapy for Philadelphia chromosome negative ALL in children and young people  
26 aged 1 to 24 years, which opened in 2003 and closed in 2011. The maximum age for trial  
27 entry was the 18<sup>th</sup> birthday when the trial began, but was increased to the 20<sup>th</sup> birthday in  
28 2006 and the 25<sup>th</sup> birthday in 2007. Details of the protocol and outcomes of the trial have  
29 been published previously<sup>19-21</sup>. The consent form for UKALL2003 included explicit consent  
30 for data sharing with national cancer registries. Patients with Philadelphia chromosome  
31 positive ALL were eligible for post induction recruitment to the ESPHALL trial if aged less  
32 than 18 years (until 2009) or UKALL XII if aged 18 years or older (until 2006). The lower age  
33 limit for recruitment of patients with Philadelphia negative ALL to UKALL XII was  
34 sequentially increased according to the change in the upper age limit for UKALL2003 to  
35 avoid overlapping age eligibility for the two trials. These changes to age eligibility for  
36 UKALL2003 and UKALL XII were communicated in newsletters circulated by the clinical trials  
37 unit and presented at both paediatric and adult annual national leukaemia trials update  
38  
39  
40  
41  
42  
43  
44  
45  
46  
47  
48  
49  
50  
51  
52  
53  
54  
55  
56  
57  
58  
59  
60

1  
2  
3 meetings. The National Institute for Health Research also hosts a trial database, which  
4  
5 summarised all of these trials and was searchable by any clinician. The STROBE guidelines  
6  
7 for the reporting of observational studies was followed.  
8  
9

### 10 11 12 **Study Population**

13  
14 The study population for this analysis was defined as any patient diagnosed with ALL in  
15  
16 2004-2010 (the 7 complete years during which UKALL2003 was recruiting), aged 15-24 years  
17  
18 and resident in England at the time of diagnosis. The diagnosis reported to the registry and  
19  
20 trial was made in the laboratories of treating centre, without central verification. Details  
21  
22 were obtained on the 337 TYA patients who took part in the UKALL2003 Trial including  
23  
24 name, date of birth and hospital of treatment, but not address or country of residence.  
25  
26 Details of missing NHS numbers on UKALL2003 were obtained using the NHS Strategic  
27  
28 Tracing Service (NSTS), which contains details of all individuals registered with a GP in  
29  
30 England or Wales. The National Cancer Data Repository (NCDR) was the database used to  
31  
32 undertake cancer analyses at the time this study commenced. It included details of all  
33  
34 patients diagnosed with cancer who were resident in England. A frozen copy of NCDR was  
35  
36 compiled from the eight regional registries then in existence, when cancer data for a given  
37  
38 calendar year were considered to be near complete – a process which took considerable  
39  
40 time. The version used in this study was that produced when 2010 data were considered  
41  
42 complete. The patients in UKALL2003 were matched against those on the NCDR database  
43  
44 who were diagnosed in 2004-2010 aged 15-24 with any cancer. Patients recorded on NCDR  
45  
46 as having ALL and who were not on the UKALL database were included in our study as the  
47  
48 non-trial arm.  
49  
50  
51  
52  
53  
54  
55  
56  
57  
58  
59  
60



1  
2  
3 The move to a single cancer registry for England, which was completed while this study was  
4  
5 underway, resulted in the production of the English National Cancer Online Registration  
6  
7 Environment (ENCORE). This is a live database, which is updated regularly. It is used by  
8  
9 registry staff to determine if a given patient has already been registered. It contains details  
10  
11 of all residents of England who have been diagnosed with cancer, including patients  
12  
13 reported to the National Cancer Registration and Analysis Service (NCRAS) but with  
14  
15 insufficient details to be counted as a case of cancer; these are called provisional  
16  
17 registrations and are upgraded to full registrations when further details are obtained.  
18  
19 ENCORE also contains details of cancer patients managed at a hospital in England but  
20  
21 resident elsewhere. Patients on the UKALL database not found on NCDR were manually  
22  
23 checked on ENCORE, in order to determine the reasons why these patients were not on  
24  
25 NCDR and to identify any patients reported to NCRAS after the NCDR was compiled. Those  
26  
27 whose records were found on ENCORE and who fulfilled the study definition were added to  
28  
29 patients on both UKALL and NCDR to make up the trial arm in our study.  
30  
31  
32  
33  
34  
35  
36  
37  
38  
39  
40  
41  
42  
43  
44  
45  
46  
47

48  
49  
50  
51  
52  
53  
54  
55  
56  
57  
58  
59  
60

Details of patients on the UKALL database but not found on ENCORE were checked against the NSTS to determine whether living in England or Wales. The UKALL database was interrogated for the country of the treating hospital for those patients not found on NSTS.

### Consent

Registry data was routinely submitted to the national cancer registry under legal permissions that were initially included under Section 60 of the Health and Social Care Act 2001 and more recently Section 251 of the NHS Act 2006. This permission is renewed

1  
2  
3 annually. Identifiable trial data were shared with explicit patient consent obtained during  
4  
5 trial registration.  
6  
7  
8  
9

## 10 11 12 **Analyses**

13  
14 We determined the number and percentage of patients who participated in UKALL2003 by  
15  
16 year of diagnosis and age group. Survival rates were calculated for patients in the trial and  
17  
18 not in the trial, excluding patients on whom the only available data were from death  
19  
20 certificates – death certificate only (DCO) registrations. Death details were obtained from  
21  
22 NCDR up to the end of 2012, with follow-up starting from the date of diagnosis recorded on  
23  
24 NCDR; the equivalent data were obtained from ENCORE for those patients not found on  
25  
26 NCDR. One-year, two-year and two-year conditional on one-year relative survival rates  
27  
28 were calculated for 15-24, 15-19 and 20-24 year olds for trial and non-trial patients.  
29  
30 Relative survival was estimated from life tables stratified by age, sex and time using the  
31  
32 Stata strsr programme<sup>22</sup>. Expected survival was estimated using the Ederer II method.  
33  
34  
35  
36  
37  
38  
39

40 Differences in relative survival were modelled using a multiple regression approach based  
41  
42 on generalised linear models, assuming a Poisson distribution for the observed number of  
43  
44 deaths<sup>23</sup>. Differences were considered statistically significant if two-sided P values were  
45  
46 <0.05. All statistical analyses were conducted using Stata version 13.  
47  
48  
49

50  
51  
52 The numbers of deaths in those patients included in the survival analysis were determined  
53  
54 for each three-month period during the two years of follow-up and percentages calculated  
55  
56 based on the number of patients alive at the beginning of each three-month period. P  
57  
58  
59  
60

1  
2  
3 values were calculated using the two-tailed z-test for difference between proportions. 95%  
4  
5 confidence intervals for percentage deaths were derived using the Binomial distribution  
6  
7 based on the Wilson Score method<sup>24</sup>.  
8  
9

### 10 11 12 **Completion of TYAC form**

13  
14 During 2009 and 2010, enhanced cancer registration forms were in use throughout the  
15  
16 English TYA Principal Treatment Centres (PTCs). The forms were developed by the  
17  
18 professional organisation Teenagers and Young Adults with Cancer (TYAC)  
19  
20 (<http://www.tyac.org.uk>) and were collected and matched with registry data by the lead UK  
21  
22 regional registry for TYA cancer at the time, the North West Cancer Intelligence Service  
23  
24 (now part of Public Health England). Receipt of a TYAC form by the registry was used as a  
25  
26 proxy that the patient's management had been provided by or at least discussed with the  
27  
28 regional TYA PTC. We calculated the percentage of patients in the trial for whom a TYAC  
29  
30 form was completed to explore the relationship between access to TYA specialist services  
31  
32 and participation in the trial.  
33  
34  
35  
36  
37  
38  
39  
40  
41  
42  
43  
44  
45  
46  
47  
48  
49  
50  
51  
52  
53  
54  
55  
56  
57  
58  
59  
60

## RESULTS

### Study population

The process by which the study population was selected is shown in Figure 1. Details on 227 of the 337 patients on the UKALL database were found on NCDR; twenty of whom had a diagnosis other than ALL on NCDR. The most common diagnoses were leukaemia (5), acute leukaemia (4), acute myeloid leukaemia (4) and Non-Hodgkin lymphoma (4). 272 patients with a diagnosis of ALL on NCDR were not on the UKALL database and these constituted the non-trial arm of this study.

Of the 110 patients on UKALL2003 not found on NCDR, 43 were identified on ENCORE. 31 did not fulfil the study definition for the following reasons:

- (a) 26 were diagnosed in 2011
- (b) One diagnosed in 2003
- (c) One aged 14 at time of diagnosis
- (d) One treated in England but not a resident
- (e) Two were provisional registrations that were not confirmed

The twelve patients who fulfilled the study definition had been reported to the NCRAS after the NCDR was compiled. These patients were added to the 227 found on both the UKALL2003 and NCDR databases to make up the trial arm of this study.

Of the 67 patients on the UKALL2003 database not found on ENCORE, 60 were not resident in England confirmed by having a non-English address on NSTS and/or the treating hospital

1  
2  
3 recorded on UKALL2003 as being outside England. The remaining seven patients, who did  
4  
5 fulfil the study definition, were excluded for a number of reasons, including not being  
6  
7 reported to the registry by the treating hospital or insufficient details provided to allow a  
8  
9 full registration, and inaccurate personal details on the UKALL2003 database resulting in  
10  
11 patients not being found on ENCORE.  
12  
13

### 14 15 16 17 **Participation in UKALL2003**

18  
19 A total of 511 patients aged 15-24 years were included in the analyses, of whom 239  
20  
21 (47.5%) had participated in UKALL2003 (Table 1a). The overall number of 20-24 year old  
22  
23 patients recruited (36 patients) was lower than 18-19 year olds (54 patients) and 15-17 year  
24  
25 olds (149 patients). In total, 203 (84.9%) of 239 trial patients were aged 15-19 years. Trial  
26  
27 participation improved over time, from 59.3% in 2004-2007 to 76.7% in 2008-2010 ( $p =$   
28  
29 0.007) in the 15-17 year old group (the only group eligible for the trial for the entire study  
30  
31 period)(Table 1b). It is likely that the sequential changes in age eligibility criteria for  
32  
33 UKALL2003 were partly responsible for low recruitment numbers in the older age groups.  
34  
35 However, for the period 2008-2010, during which all 15-24 year olds were eligible for the  
36  
37 study, participation remained higher in younger patients: 76.3% of 15-19 year olds  
38  
39 compared with 45.1% of 20-24 year olds ( $p < 0.001$ ).  
40  
41  
42  
43  
44  
45  
46  
47

### 48 **Recruitment to Other Clinical Trials**

49  
50 Since the trial consent forms for ESPHALL and UKALLXII did not include explicit consent for  
51  
52 data sharing with the national registries, it was not possible to access detailed information  
53  
54 from these trial databases. However, the overall number of UK patients recruited to these  
55  
56 trials within the study period included 3 patients aged 15-17 years recruited to ESPHALL and  
57  
58  
59  
60

1  
2  
3 100 patients aged 15-24 years recruited to UKALL XII. Although ESPHALL recruited only  
4  
5 those with Philadelphia chromosome positive disease, UKALL XII recruited both Philadelphia  
6  
7 chromosome positive and negative ALL patients. Given the sequential increase in the lower  
8  
9 age limit for UKALL XII for Philadelphia chromosome negative ALL was sequentially  
10  
11 increased over time, the highest proportion of patients recruited to UKALL XII would be  
12  
13 those with Philadelphia chromosome negative disease in the older age group.  
14  
15  
16  
17  
18  
19  
20  
21

## 22 **Survival**

23  
24 503 patients were included in the survival analysis: 239 in the trial arm and 264 in the non-  
25  
26 trial arm. Patients aged 15-24 years recruited to the UKALL2003 trial had 17.9% better two-  
27  
28 year survival (85.4% vs 67.5%,  $p < 0.001$ ), 8.9% better one-year survival (90.8% vs 81.9%,  $p =$   
29  
30 0.004) and 11.6% better two-year survival conditional on one-year survival (94.1% vs 82.5%,  
31  
32  $p = 0.001$ ) compared to non-trial patients (Table 2, Figure 2). To determine whether the  
33  
34 effects of trial recruitment on survival were measurable across the age cohort we analysed  
35  
36 15-19 year olds and 20-24 year olds separately. The differences in survival at all time points  
37  
38 remained significant in the 15-19 year old age group (Table 2). Two-year and conditional  
39  
40 two-year survival showed a non-significant trend to better in trial patients than non-trial  
41  
42 patients in the 20-24 year old cohort. The results for 2008-10 (after closure of UKALLXII) are  
43  
44 similar to those for the whole study period: 20-24 year olds in the trial had a two-year  
45  
46 survival 10.2% better than those not in the trial, but this did not reach statistical significance  $p$   
47  
48 = 0.393.  
49  
50  
51  
52  
53  
54  
55  
56  
57  
58  
59  
60

1  
2  
3 To determine whether the deaths were evenly spaced after diagnosis we next analysed the  
4  
5 number of deaths in trial and non-trial patients by quarter-year from diagnosis. Table 3  
6  
7 shows the number and percentage of deaths by trial status for each quarter-year and year  
8  
9 of follow-up. A total of 35 (14.6%) trial patients died in the two years following diagnosis  
10  
11 compared with 86 (32.6%) of non-trial patients ( $p < 0.001$ ). The difference in the proportion  
12  
13 of deaths between trial and non-trial patients was 9% (18.2% - 9.2%;  $p = 0.004$ ) fewer  
14  
15 deaths in trial patients during the first year and 11.6% (17.6% - 6.0%;  $p < 0.001$ ) during the  
16  
17 second. However, the largest number of deaths overall and the largest difference between  
18  
19 trial and non-trial patients for any quarter was in the first three months after diagnosis: 6  
20  
21 (2.5%) trial patients died compared with 21 (8.0%) non-trial patients ( $p = 0.007$ ).  
22  
23  
24  
25  
26  
27  
28

#### 29 **Exploratory analysis of trial recruitment by place of care**

30  
31 The data available in national registry records were not sufficient to allow us to determine  
32  
33 the reasons for non-recruitment of non-trial patients, how non-trial patients were treated  
34  
35 or the training background of treating physicians (paediatric, TYA or adult). However, we  
36  
37 were able to compare trial recruitment rates between patients for whom an enhanced TYAC  
38  
39 cancer registration form had been submitted and those with no TYAC form. The trial  
40  
41 recruitment rates were significantly different between the two groups: 73.5% of patients  
42  
43 with a submitted TYAC form were recruited compared to 51.9% of those for whom a form  
44  
45 was not submitted ( $p = 0.001$ , Table 4). The difference was highest among patients aged 20-  
46  
47 24 years (61.5% trial recruitment among patients with associated TYAC forms versus 36.4%  
48  
49 without). Patients for whom a TYAC form was submitted had a two-year survival of 80.8%  
50  
51 compared with 82.8% for those without a form ( $p = 0.771$ ).  
52  
53  
54  
55  
56  
57  
58  
59  
60

## DISCUSSION

By combining trial and national cancer registry data we have demonstrated a significant survival advantage to participation in the most recently completed, large prospective clinical trial for TYA patients with ALL, which is measurable at a population level. This is the first study to have demonstrated such a survival advantage in any cancer type in the TYA age group. The difference in survival was highly significant, with a 17.9% superior survival at two years in trial patients compared to non-trial patients. The risk of mortality at 2 years in those treated outside of the trial was twice that of those on UKALL2003 (32.6% compared to 14.6%,  $p < 0.001$ ) and was most striking during the first 3 months after diagnosis (8.0% compared to 2.5%,  $p = 0.007$ ).

This retrospective analysis of the impact of clinical trial recruitment on survival was possible because the consent process for UKALL2003 included explicit consent for the trial data to be shared with regional and national cancer registries, and because the UK has full population coverage for cancer registration. This study, however, did show a number of limitations of the cancer registration system for England during the period 2004-2010 including a) Accuracy of diagnosis: twenty patients on UKALL2003 with a diagnosis other than ALL on NCDR and b) Timeliness: twelve patients on ENCORE but not on NCDR. In addition, the main source of diagnostic data for cancer registries during the study period was histopathology laboratories, leading to difficulties in obtaining high quality data on patients with ALL. In addition, there were no data available for the well-established prognostic variables in ALL, thus precluding comparison of the frequency of different risk groups between those treated on or off trial. Data were collected by regional registries and then compiled into a national



1  
2  
3 database, which took considerable time. Public Health England (PHE) has made many  
4  
5 improvements since taking over the NCRAS a few years ago including a) Moving to a single,  
6  
7 completely integrated national registry, b) Setting up systems that report in real time from a  
8  
9 wide variety of sources, such as MDTs, leading to more timely and accurate data and c)  
10  
11 Reviewing access to specialist haematological diagnostic datasets to improve the data  
12  
13 quality of haematological cancers and d) Producing an analysis database that is constantly  
14  
15 kept up to date.  
16  
17  
18  
19

20  
21 We also recognise a number of potential confounding variables in this study. Potential  
22  
23 confounders which could increase the observed difference between those on trial compared  
24  
25 to those treated off trial include centre effect, selection bias and use of a superior protocol,  
26  
27 and those reducing the difference include recruitment to other ALL clinical trials.  
28  
29  
30  
31

32  
33 Any potential benefit to participation of young people in clinical trials may be derived from  
34  
35 the treating centre rather than trial participation itself (centre effect). Centres offering  
36  
37 clinical trials are often larger, academic institutions, seeing a higher number of patients with  
38  
39 a specific disease, a larger clinical research infrastructure and a more resourced workforce,  
40  
41 all of which may contribute to a more favourable outcome<sup>16</sup>. Over the last 10 years there  
42  
43 has been a gradual reconfiguration of services providing care for young people aged 16-24  
44  
45 years with cancer in the UK; this includes the development of Principal Treatment Centres,  
46  
47 designated of other hospitals offering TYA services closer to the patients' homes and an  
48  
49 overview of the holistic care of all patients provided by the TYA multidisciplinary team  
50  
51 (MDT). Between 2004 to 2010, these pathways were not fully established, but the  
52  
53 submission of TYAC enhanced cancer registration forms have been used as a surrogate  
54  
55  
56  
57  
58  
59  
60

1  
2  
3 indicator that an individual patient received treatment according to regionally agreed and  
4  
5 commissioned TYA pathways under the supervision of the TYA PTC. It is therefore  
6  
7 interesting to note that a significantly higher proportion of patients recruited onto  
8  
9 UKALL2003 had been registered centrally via the TYAC notification system than non-trial  
10  
11 patients (73.5% with a TYAC form compared to 51.9% without,  $p=0.001$ ). This was  
12  
13 particularly marked in the older age group. However, the finding that two-year survival was  
14  
15 not higher in those patients with a submitted TYAC form does not support the argument  
16  
17 that the better survival for those in the trial was mainly due to having been managed at  
18  
19 larger centres.  
20  
21  
22  
23  
24  
25

26  
27 Whilst selection bias, in which the highest risk patients (eg those with a very high white  
28  
29 count, renal or hepatic impairment or large mediastinal mass at presentation) could not  
30  
31 participate in the trial, may be a confounder it is unlikely to have had a significant impact on  
32  
33 our results as a) UKALL2003 was a population-based trial for which all children and young  
34  
35 people with ALL were eligible, irrespective of severity or risk group at presentation and b) it  
36  
37 also permitted recruitment within 7 days of commencement of chemotherapy. Patients  
38  
39 with Philadelphia chromosome positive (Ph+ve) ALL were ineligible for UKALL2003 , but  
40  
41 Ph+ve patients were included in the non-trial arm, as NCDR did not include details of Ph  
42  
43 chromosome status . The presence of the Philadelphia chromosome in ALL confers a poorer  
44  
45 prognosis<sup>25</sup> and could therefore increase the survival difference observed in this study.  
46  
47  
48 However we feel that this is unlikely to have been a significant confounding variable since  
49  
50 the prevalence of Ph+ve ALL in UKALL2003 overall was only 1.8% and the observed  
51  
52 difference between groups was non-significant in the older patients despite the frequency  
53  
54 of the Philadelphia chromosome increasing with increasing age.  
55  
56  
57  
58  
59  
60

1  
2  
3  
4  
5 During the study period, TYA patients with Ph+ve disease were eligible for the ESPHALL or  
6  
7 UKALLXII (until 2006) trials, depending on age, and older patients with Ph-ve disease were  
8  
9 eligible for recruitment onto UKALLXII (lower age limit 18<sup>th</sup> birthday from 2004, 20<sup>th</sup> birthday  
10  
11 from 2006 and 25<sup>th</sup> birthday from 2007). Whilst we do not know the proportions of non-  
12  
13 UKALL2003 patients recruited to these trials, if trial participation in itself confers a survival  
14  
15 advantage, recruitment of patients to these other clinical trials would be expected to reduce  
16  
17 observed differences between our two study groups, reduce any residual confounding from  
18  
19 the exclusion of Ph+ve patients from UKALL2003 and may have also contributed to the non-  
20  
21 significant difference in survival between trial and non-trial patients in the 20-24 year old  
22  
23 group. This is further supported by the observation that only 3 UK patients aged 15-17  
24  
25 years were recruited to ESPHALL (Ph+ve ALL only), but 100 patients aged 16-24 years were  
26  
27 recruited to UKALLXII (Ph+ve and -ve ALL). The relative contribution of treatment protocol  
28  
29 on outcome differences was impossible to assess in this study, since the registry dataset did  
30  
31 not include which specific regimen was used.  
32  
33  
34  
35  
36  
37  
38  
39  
40

41 Recruitment to clinical trials in TYA cancer patients is poor due to a range of factors  
42  
43 including lack of an available trial, heterogenous referral pathways, differences in treating  
44  
45 centres as well as lack of desire to participate by this age group<sup>4 9 13 26</sup>. Overall,  
46  
47 approximately 50% of TYA patients in England with ALL participated in UKALL2003.  
48  
49

50 Although this figure is lower than the proportion of younger children who participated in  
51  
52 the trial, it compares favourably to other cancer trials reported in this age group; in the UK  
53  
54 between 2005 to 2010, only 850 of 2860 patients aged 15–19 years (30%), and 562 of 4011  
55  
56 patients aged 20–24 years (14%) were recruited to a clinical trial<sup>4</sup>. Encouragingly,  
57  
58  
59  
60

1  
2  
3 recruitment to UKALL2003 improved over time. In part, this was expected in the 18-24 year  
4  
5 old group, given the sequential increase in age eligibility criteria over time. However, even  
6  
7 in the 15-17 year old patients who were eligible for participation throughout the study  
8  
9 period, participation increased from 59.3% in 2004-2007 to 76.7% in 2008-2010 ( $p = 0.007$ ).  
10  
11 Despite this, there were still a substantial number of young people who did not participate,  
12  
13 particularly amongst 20-24 year olds, where participation was only 45.1%. Fern et al  
14  
15 propose that there are five factors (five "A's") important in improving TYA cancer trial  
16  
17 recruitment; available, accessible, aware, appropriate, and acceptable. The relatively high  
18  
19 level of recruitment of TYA ALL patients to UKALL2003 and its improvement over time  
20  
21 probably reflects an increasing awareness (as a result of newsletters and the trial  
22  
23 coordinators presenting at a series of national meetings) and *acceptability* amongst  
24  
25 paediatric and adult haematologists that UKALL2003 offered an effective (i.e. *appropriate*)  
26  
27 treatment strategy, with increasing *availability* and *accessibility* as the age range was  
28  
29 increased and a greater number of adult centres opened the trial.  
30  
31  
32  
33  
34  
35  
36  
37

38 In conclusion, we report a specific survival advantage to participation in the UKALL2003 trial  
39  
40 for TYA patients with ALL. This is the first study to have demonstrated a survival advantage  
41  
42 of trial participation in TYA patients with any cancer and suggests a benefit to an individual  
43  
44 patient in taking part. These data highlight the importance of national and international  
45  
46 efforts to a) improve recruitment of TYA cancer patients to clinical trials, b) configure TYA  
47  
48 cancer services to provide young people with access to appropriate trials and the  
49  
50 opportunity to participate and c) the need to continue to collect accurate treatment and  
51  
52 outcome data at a population level to allow evaluation of treatment in patients who have  
53  
54 not accessed clinical trials. In England these duties are the responsibilities respectively of  
55  
56  
57  
58  
59  
60

1  
2  
3  
4  
5  
6  
7  
8  
9  
10  
11  
12  
13  
14  
15  
16  
17  
18  
19  
20  
21  
22  
23  
24  
25  
26  
27  
28  
29  
30  
31  
32  
33  
34  
35  
36  
37  
38  
39  
40  
41  
42  
43  
44  
45  
46  
47  
48  
49  
50  
51  
52  
53  
54  
55  
56  
57  
58  
59  
60

the National Cancer Research Institute, NHS England and Public Health England, working together towards the goal of best patient outcomes. The data we present suggest that significant improvements in the delivery of appropriate cancer treatment are still much needed for this vulnerable young population.

For peer review only

## ACKNOWLEDGEMENTS AND AUTHOR CONTRIBUTIONS

Patients, families and clinicians participating in UKALL2003

Regional and institutional data managers

The study was designed by RH, AM, SS, MK, RF, CS and MMC. RH, CR and AV designed, recruited to and analysed data for the UKALL2003 study. The statistical analysis of this study was performed by SS, MK, AM and MMC. All authors contributed to the interpretation of data and preparation of the manuscript and approve this final version.

## COMPETING INTERESTS STATEMENT

We have read and understood BMJ policy on declaration of interests and declare that we have no competing interests.

## DATA SHARING STATEMENT

There are no additional unpublished data from this study

## REFERENCES

1. O'Hara C, Moran A, Whelan JS, et al. Trends in survival for teenagers and young adults with cancer in the UK 1992-2006. *Eur J Cancer* 2015;**51**(14):2039-48.
2. Barr RD. Adolescents, young adults, and cancer--the international challenge. *Cancer* 2011;**117**(10 Suppl):2245-9.
3. Meadows AT. Pediatric cancer survivors: Past history and future challenges. *Curr Probl Cancer* 2003;**27**(3):112-26.
4. Fern LA, Lewandowski JA, Coxon KM, et al. Available, accessible, aware, appropriate, and acceptable: a strategy to improve participation of teenagers and young adults in cancer trials. *The Lancet Oncology* 2014;**15**(8):e341-50.
5. Burke ME, Albritton K, Marina N. Challenges in the recruitment of adolescents and young adults to cancer clinical trials. *Cancer* 2007;**110**(11):2385-93.
6. Bleyer WA, Tejeda H, Murphy SB, et al. National cancer clinical trials: children have equal access; adolescents do not. *J Adolesc Health* 1997;**21**(6):366-73.
7. Krailo MD, Bernstein L, Sullivan-Halley J, et al. Patterns of enrollment on cooperative group studies. An analysis of trends from the Los Angeles County Cancer Surveillance Program. *Cancer* 1993;**71**(10 Suppl):3325-30.
8. Fern L, Davies S, Eden T, et al. Rates of inclusion of teenagers and young adults in England into National Cancer Research Network clinical trials: report from the National Cancer Research Institute (NCRI) Teenage and Young Adult Clinical Studies Development Group. *British journal of cancer* 2008;**99**(12):1967-74.
9. Tai E, Buchanan N, Westervelt L, et al. Treatment setting, clinical trial enrollment, and subsequent outcomes among adolescents with cancer: a literature review. *Pediatrics* 2014;**133** Suppl 3:S91-7.
10. Parsons HM, Harlan LC, Seibel NL, et al. Clinical trial participation and time to treatment among adolescents and young adults with cancer: does age at diagnosis or insurance make a difference? *Journal of clinical oncology : official journal of the American Society of Clinical Oncology* 2011;**29**(30):4045-53.
11. Downs-Canner S, Shaw PH. A comparison of clinical trial enrollment between adolescent and young adult (AYA) oncology patients treated at affiliated adult and pediatric oncology centers. *J Pediatr Hematol Oncol* 2009;**31**(12):927-9.
12. Mitchell AE, Scarcella DL, Rigutto GL, et al. Cancer in adolescents and young adults: treatment and outcome in Victoria. *Med J Aust* 2004;**180**(2):59-62.
13. Grigsby TJ, Kent EE, Montoya MJ, et al. Attitudes Toward Cancer Clinical Trial Participation in Young Adults with a History of Cancer and a Healthy College Student Sample: A Preliminary Investigation. *J Adolesc Young Adult Oncol* 2014;**3**(1):20-27.
14. Shaw PH, Ritchey AK. Different rates of clinical trial enrollment between adolescents and young adults aged 15 to 22 years old and children under 15 years old with cancer at a children's hospital. *J Pediatr Hematol Oncol* 2007;**29**(12):811-4.
15. Stiller CA, Eatock EM. Patterns of care and survival for children with acute lymphoblastic leukaemia diagnosed between 1980 and 1994. *Arch Dis Child* 1999;**81**(3):202-8.
16. Ferrari A, Bleyer A. Participation of adolescents with cancer in clinical trials. *Cancer Treat Rev* 2007;**33**(7):603-8.
17. Kumar A, Soares H, Wells R, et al. Are experimental treatments for cancer in children superior to established treatments? Observational study of randomised controlled trials by the Children's Oncology Group. *BMJ* 2005;**331**(7528):1295.

18. Peppercorn JM, Weeks JC, Cook EF, et al. Comparison of outcomes in cancer patients treated within and outside clinical trials: conceptual framework and structured review. *Lancet* 2004;**363**(9405):263-70.
19. Vora A, Goulden N, Mitchell C, et al. Augmented post-remission therapy for a minimal residual disease-defined high-risk subgroup of children and young people with clinical standard-risk and intermediate-risk acute lymphoblastic leukaemia (UKALL 2003): a randomised controlled trial. *The Lancet Oncology* 2014;**15**(8):809-18.
20. Vora A, Goulden N, Wade R, et al. Treatment reduction for children and young adults with low-risk acute lymphoblastic leukaemia defined by minimal residual disease (UKALL 2003): a randomised controlled trial. *The Lancet Oncology* 2013;**14**(3):199-209.
21. Hough R, Rowntree C, Goulden N, et al. Efficacy and toxicity of a paediatric protocol in teenagers and young adults with Philadelphia chromosome negative acute lymphoblastic leukaemia: results from UKALL 2003. *Br J Haematol* 2016;**172**(3):439-51.
22. Dickman PW, Lambert PC, Coviello E, et al. Estimating net survival in population-based cancer studies. *Int J Cancer* 2013;**133**(2):519-21.
23. Dickman PW, Sloggett A, Hills M, et al. Regression models for relative survival. *Stat Med* 2004;**23**(1):51-64.
24. Observatories AoPH. 1. APHO. Technical Briefing 3, Commonly Used Public Health Statistics and their Confidence Intervals 2008.
25. Pui CH, Evans WE. Treatment of acute lymphoblastic leukemia. *The New England journal of medicine* 2006;**354**(2):166-78.
26. Hendricks-Ferguson VL, Cherven BO, Burns DS, et al. Recruitment strategies and rates of a multi-site behavioral intervention for adolescents and young adults with cancer. *J Pediatr Health Care* 2013;**27**(6):434-42.



**FIGURE AND TABLE TITLES**

**Figure 1: Study population derived from matching UKALL2003 against the National Cancer**

**Data Repository (NCDR) and ENCORE**

**Figure 2: Two-year relative survival by age group and trial status**

**Table 1: Participation in UKALL2003 by age group and year of diagnosis**

**Table 1a: All Patients**

**Table 1b: Trial Participation over time in 15-17 year olds**

**Table 2: One- and two-year survival by age group and trial status**

**Table 3: Number and percentage of patients aged 15-24 who died in the two years**

**following diagnosis, by 3 month period, year and trial status**

**Table 4: Number and percentage of patients in trial by whether a TYAC form was received**

**by age group in 2009-10**

Table 1: Participation in UKALL2003 by age group and year of diagnosis

Table 1a: All Patients

| Year of diagnosis | 15-17 years |            |           | 18-19 years |            |           | 20-24 years |            |           | 15-24 years |            |           |
|-------------------|-------------|------------|-----------|-------------|------------|-----------|-------------|------------|-----------|-------------|------------|-----------|
|                   | Proportion  | Percentage | 95% CI    |
| 2004              | 19/34       | 55.9       | 39.5-71.1 | 0/6         | 0.0        | 0.0-39.0  | 0/25        | 0.0        | 0-13.3    | 19/65       | 29.2       | 19.6-41.2 |
| 2005              | 26/45       | 57.8       | 43.3-71.0 | 0/20        | 0.0        | 0-16.1    | 0/23        | 0.0        | 0-14.3    | 26/88       | 29.5       | 21.0-39.8 |
| 2006              | 18/29       | 62.1       | 44.0-77.3 | 9/26        | 34.6       | 19.4-53.8 | 0/19        | 0.0        | 0-29.9    | 27/74       | 36.5       | 26.4-47.9 |
| 2007              | 20/32       | 62.5       | 45.3-77.1 | 8/14        | 57.1       | 32.6-78.6 | 4/32        | 12.5       | 5.0-28.1  | 32/78       | 41.0       | 30.8-52.1 |
| 2008              | 23/30       | 76.7       | 59.1-88.2 | 16/18       | 88.9       | 67.2-96.9 | 8/23        | 34.8       | 18.8-55.1 | 47/71       | 66.2       | 54.6-76.1 |
| 2009              | 24/31       | 77.4       | 60.2-88.6 | 13/20       | 65.0       | 43.3-81.9 | 10/26       | 38.5       | 22.4-57.5 | 47/77       | 61.0       | 49.9-71.2 |
| 2010              | 19/25       | 76.0       | 56.6-88.5 | 8/11        | 72.7       | 43.4-90.3 | 14/22       | 63.6       | 43.0-80.3 | 41/58       | 70.7       | 58.0-80.8 |
| 2004-07           | 83/140      | 59.3       | 51.0-67.1 | 17/66       | 25.8       | 16.7-37.4 | 4/99        | 4.0        | 1.6-9.9   | 104/305     | 34.1       | 29.0-39.6 |
| 2008-10           | 66/86       | 76.7       | 66.8-84.4 | 37/49       | 75.5       | 61.9-85.4 | 32/71       | 45.1       | 34.0-56.6 | 135/206     | 45.1       | 34.0-56.6 |
| 2004-10           | 149/226     | 65.9       | 59.5-71.8 | 54/115      | 47.0       | 38.1-56.0 | 36/170      | 21.2       | 15.7-27.9 | 239/511     | 46.8       | 42.5-51.1 |

Table 1b: Trial Participation over time in 15-17 year olds

| Year of diagnosis | Proportion | Percentage | 95% CI    | p value |
|-------------------|------------|------------|-----------|---------|
| 2004-07           | 83/140     | 59.3       | 51.0-67.1 | 0.007   |
| 2008-10           | 66/86      | 76.7       | 66.8-84.4 |         |

1  
2  
3  
4  
5  
6  
7  
8  
9  
10  
11  
12  
13  
14  
15  
16  
17  
18  
19  
20  
21  
22  
23  
24  
25  
26  
27  
28  
29  
30  
31  
32  
33  
34  
35  
36  
37  
38  
39  
40  
41  
42  
43  
44  
45  
46  
47  
48  
49

Table 2: One- and two-year survival by age group and trial status

| Trial Status                                 | Age group | Number of patients | Deaths | Survival (%) | 95% CI    | P value |
|----------------------------------------------|-----------|--------------------|--------|--------------|-----------|---------|
| <b>1-year survival</b>                       |           |                    |        |              |           |         |
| Trial                                        | 15-19     | 203                | 17     | 91.7         | 86.9-94.7 | <0.001  |
| Non-Trial                                    |           | 134                | 30     | 77.6         | 69.6-83.8 |         |
| Trial                                        | 20-24     | 36                 | 5      | 86.2         | 69.8-94.0 | 0.969   |
| Non-Trial                                    |           | 130                | 18     | 86.2         | 79.0-91.1 |         |
| Trial                                        | 15-24     | 239                | 22     | 90.8         | 86.4-93.9 | 0.004   |
| Non-Trial                                    |           | 264                | 48     | 81.9         | 76.6-86.0 |         |
| <b>2-year conditional on 1-year survival</b> |           |                    |        |              |           |         |
| Trial                                        | 15-19     | 186                | 10     | 94.7         | 90.3-97.1 | 0.008   |
| Non-Trial                                    |           | 104                | 16     | 84.7         | 76.2-90.4 |         |
| Trial                                        | 20-24     | 31                 | 3      | 90.4         | 73.0-96.9 | 0.236   |
| Non-Trial                                    |           | 112                | 22     | 80.4         | 71.8-86.7 |         |
| Trial                                        | 15-24     | 217                | 13     | 94.1         | 90.0-96.6 | 0.001   |
| Non-Trial                                    |           | 216                | 38     | 82.5         | 76.7-87.0 |         |
| <b>2-year survival</b>                       |           |                    |        |              |           |         |
| Trial                                        | 15-19     | 203                | 27     | 86.8         | 81.3-90.7 | <0.001  |
| Non-Trial                                    |           | 134                | 46     | 65.7         | 57.0-73.1 |         |
| Trial                                        | 20-24     | 36                 | 8      | 77.9         | 60.5-88.3 | 0.381   |
| Non-Trial                                    |           | 130                | 40     | 69.3         | 60.6-76.5 |         |
| Trial                                        | 15-24     | 239                | 35     | 85.4         | 80.3-89.3 | <0.001  |
| Non-Trial                                    |           | 264                | 86     | 67.5         | 61.5-72.8 |         |

Table 3: Number and percentage of patients aged 15-24 who died in the two years following diagnosis, by 3 month period, year and trial status

| Year        | Quarter | <i>In trial</i>                       |                  |        |           | <i>Not in trial</i>                   |                  |        |           | p values |
|-------------|---------|---------------------------------------|------------------|--------|-----------|---------------------------------------|------------------|--------|-----------|----------|
|             |         | Number of patients at start of period | Number of deaths | % Died | 95% CI    | Number of patients at start of period | Number of deaths | % Died | 95% CI    |          |
|             | 1st     | 239                                   | 6                | 2.5    | 1.2-5.4   | 264                                   | 21               | 8.0    | 5.3-11.9  | 0.007    |
|             | 2nd     | 233                                   | 4                | 1.7    | 0.7-4.3   | 243                                   | 5                | 2.1    | 0.9-4.7   | 0.785    |
|             | 3rd     | 229                                   | 5                | 2.2    | 0.9-5.0   | 238                                   | 11               | 4.6    | 2.6-8.1   | 0.148    |
|             | 4th     | 224                                   | 7                | 3.1    | 1.5-6.3   | 227                                   | 11               | 4.8    | 2.7-8.5   | 0.351    |
| 1st         | -       | 239                                   | 22               | 9.2    | 6.2-13.5  | 264                                   | 48               | 18.2   | 14.0-23.3 | 0.004    |
|             | 5th     | 217                                   | 2                | 0.9    | 0.3-3.3   | 216                                   | 11               | 5.1    | 2.9-8.9   | 0.011    |
|             | 6th     | 215                                   | 4                | 1.9    | 0.7-4.7   | 205                                   | 10               | 4.9    | 2.7-8.7   | 0.0851   |
|             | 7th     | 211                                   | 3                | 1.4    | 0.5-4.1   | 195                                   | 8                | 4.1    | 2.1-7.9   | 0.0965   |
|             | 8th     | 208                                   | 4                | 1.9    | 0.8-4.8   | 187                                   | 9                | 4.8    | 2.6-8.9   | 0.108    |
| 2nd         | -       | 217                                   | 13               | 6.0    | 3.5-10.0  | 216                                   | 38               | 17.6   | 13.1-23.2 | <0.001   |
| 1st and 2nd | -       | 239                                   | 35               | 14.6   | 10.7-19.7 | 264                                   | 86               | 32.6   | 27.2-38.4 | <0.001   |

For peer review only

Table 4: Number and percentage of patients in trial by whether a TYAC form was received by age group in 2009-10

| Age          | <i>Proportion of patients with a TYAC form who were in trial</i> |            |           | <i>Proportion of patients without a TYAC form who were in trial</i> |            |           | p value |
|--------------|------------------------------------------------------------------|------------|-----------|---------------------------------------------------------------------|------------|-----------|---------|
|              | Proportion                                                       | Percentage | 95% CI    | Proportion                                                          | Percentage | 95% CI    |         |
| <b>15-19</b> | 45/57                                                            | 78.9       | 66.7-87.5 | 19/30                                                               | 63.3       | 45.5-78.1 | 0.117   |
| <b>20-24</b> | 16/26                                                            | 61.5       | 42.5-77.6 | 8/22                                                                | 36.4       | 19.7-57.0 | 0.082   |
| <b>15-24</b> | 61/83                                                            | 73.5       | 63.1-81.8 | 27/52                                                               | 51.9       | 38.7-64.9 | 0.011   |

For peer review only

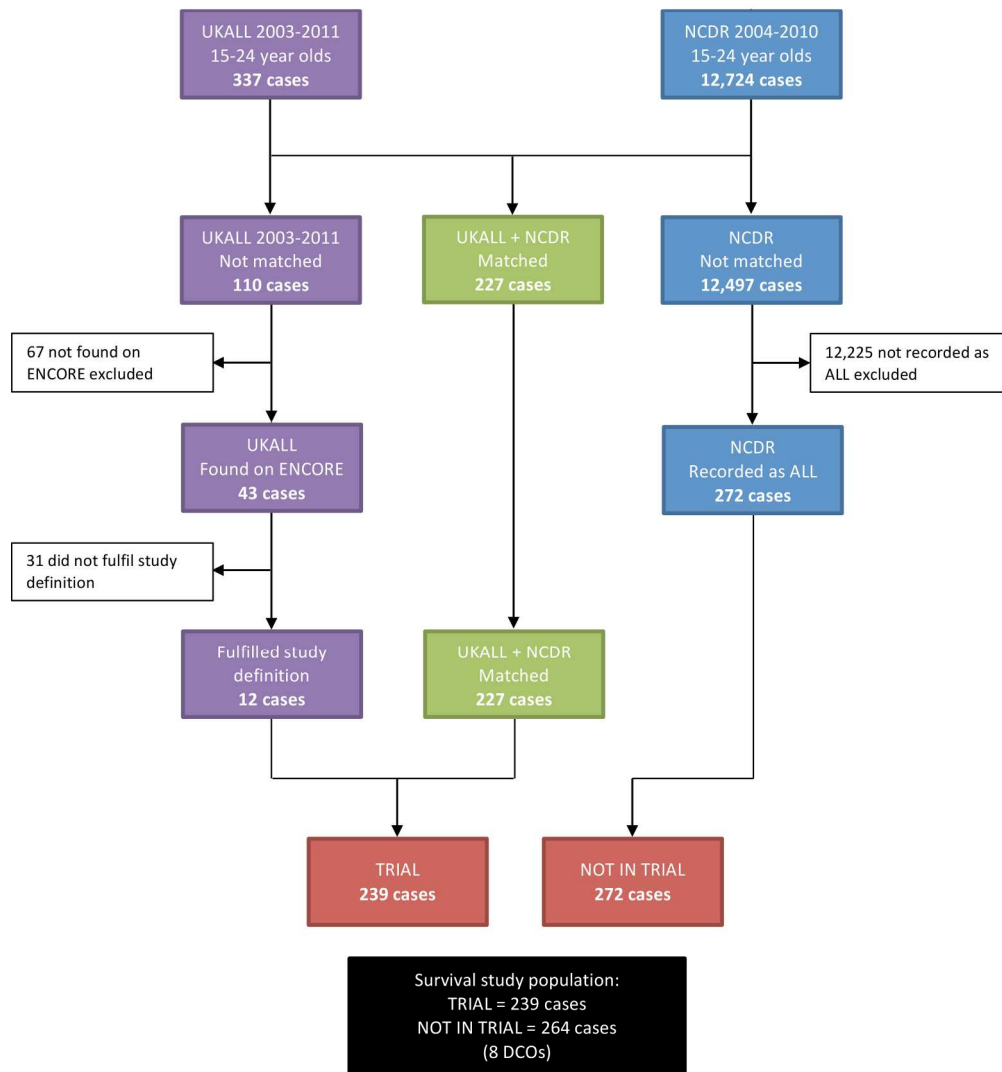

Figure 1: Study population derived from matching UKALL2003 against the National Cancer Data Repository (NCDR) and ENCORE

182x212mm (300 x 300 DPI)

1  
2  
3  
4  
5  
6  
7  
8  
9  
10  
11  
12  
13  
14  
15  
16  
17  
18  
19  
20  
21  
22  
23  
24  
25  
26  
27  
28  
29  
30  
31  
32  
33  
34  
35  
36  
37  
38  
39  
40  
41  
42  
43  
44  
45  
46  
47  
48  
49  
50  
51  
52  
53  
54  
55  
56  
57  
58  
59  
60



Figure 2: Two-year relative survival by age group and trial status  
122x82mm (300 x 300 DPI)

view only

## STROBE Statement—checklist of items that should be included in reports of observational studies

|                              | Item No | Recommendation                                                                                                                                                                                                                                                                                                                                                                                                                                                                                                                                                                                                                                                                                                                |
|------------------------------|---------|-------------------------------------------------------------------------------------------------------------------------------------------------------------------------------------------------------------------------------------------------------------------------------------------------------------------------------------------------------------------------------------------------------------------------------------------------------------------------------------------------------------------------------------------------------------------------------------------------------------------------------------------------------------------------------------------------------------------------------|
| <b>Title and abstract</b>    | 1       | (a) Indicate the study's design with a commonly used term in the title or the abstract<br><i>Page 1, line 2-4</i><br>(b) Provide in the abstract an informative and balanced summary of what was done and what was found<br><i>Pages 3-4</i>                                                                                                                                                                                                                                                                                                                                                                                                                                                                                  |
| <b>Introduction</b>          |         |                                                                                                                                                                                                                                                                                                                                                                                                                                                                                                                                                                                                                                                                                                                               |
| Background/rationale         | 2       | Explain the scientific background and rationale for the investigation being reported<br><i>Pages 6-7</i>                                                                                                                                                                                                                                                                                                                                                                                                                                                                                                                                                                                                                      |
| Objectives                   | 3       | State specific objectives, including any prespecified hypotheses<br><i>Page 7, line 4-7</i>                                                                                                                                                                                                                                                                                                                                                                                                                                                                                                                                                                                                                                   |
| <b>Methods</b>               |         |                                                                                                                                                                                                                                                                                                                                                                                                                                                                                                                                                                                                                                                                                                                               |
| Study design                 | 4       | Present key elements of study design early in the paper<br><i>Pages 8-11</i>                                                                                                                                                                                                                                                                                                                                                                                                                                                                                                                                                                                                                                                  |
| Setting                      | 5       | Describe the setting, locations, and relevant dates, including periods of recruitment, exposure, follow-up, and data collection<br><i>Pages 8-11</i>                                                                                                                                                                                                                                                                                                                                                                                                                                                                                                                                                                          |
| Participants                 | 6       | (a) <i>Cohort study</i> —Give the eligibility criteria, and the sources and methods of selection of participants. Describe methods of follow-up<br><i>Case-control study</i> —Give the eligibility criteria, and the sources and methods of case ascertainment and control selection. Give the rationale for the choice of cases and controls<br><i>Cross-sectional study</i> —Give the eligibility criteria, and the sources and methods of selection of participants<br><i>Page 8, lines 6-23</i><br>(b) <i>Cohort study</i> —For matched studies, give matching criteria and number of exposed and unexposed<br><i>Case-control study</i> —For matched studies, give matching criteria and the number of controls per case |
| Variables                    | 7       | Clearly define all outcomes, exposures, predictors, potential confounders, and effect modifiers. Give diagnostic criteria, if applicable<br><i>Pages 10-11</i><br><i>Pages 17, line 9 -19, line 14</i>                                                                                                                                                                                                                                                                                                                                                                                                                                                                                                                        |
| Data sources/<br>measurement | 8*      | For each variable of interest, give sources of data and details of methods of assessment (measurement). Describe comparability of assessment methods if there is more than one group<br><i>Pages 8-9</i><br><i>Page 11, lines 5-14</i>                                                                                                                                                                                                                                                                                                                                                                                                                                                                                        |
| Bias                         | 9       | Describe any efforts to address potential sources of bias<br><i>Pages 17, line 9 -19, line 14</i>                                                                                                                                                                                                                                                                                                                                                                                                                                                                                                                                                                                                                             |
| Study size                   | 10      | Explain how the study size was arrived at<br><i>Page 8, lines 6-23</i>                                                                                                                                                                                                                                                                                                                                                                                                                                                                                                                                                                                                                                                        |
| Quantitative variables       | 11      | Explain how quantitative variables were handled in the analyses. If applicable, describe which groupings were chosen and why                                                                                                                                                                                                                                                                                                                                                                                                                                                                                                                                                                                                  |



1  
2  
3  
4  
5  
6  
7  
8  
9  
10  
11  
12  
13  
14  
15  
16  
17  
18  
19  
20  
21  
22  
23  
24  
25  
26  
27  
28  
29  
30  
31  
32  
33  
34  
35  
36  
37  
38  
39  
40  
41  
42  
43  
44  
45  
46  
47  
48  
49  
50  
51  
52  
53  
54  
55  
56  
57  
58  
59  
60

Pages 8-9

Page 11, lines 5-14

Statistical methods

12

(a) Describe all statistical methods, including those used to control for confounding

Page 10, line 3 - Page 11, line 3

(b) Describe any methods used to examine subgroups and interactions

Page 10, line 3 - Page 11

Page 11, line 3 lines 4-14

(c) Explain how missing data were addressed

Page 8, line 5 - Page 9, line 18

(d) *Cohort study*—If applicable, explain how loss to follow-up was addressed

*Case-control study*—If applicable, explain how matching of cases and controls was addressed

*Cross-sectional study*—If applicable, describe analytical methods taking account of sampling strategy

NA

(e) Describe any sensitivity analyses

NA

Continued on next page

**Results**

|                   |     |                                                                                                                                                                                                                                                                                     |
|-------------------|-----|-------------------------------------------------------------------------------------------------------------------------------------------------------------------------------------------------------------------------------------------------------------------------------------|
| Participants      | 13* | (a) Report numbers of individuals at each stage of study—eg numbers potentially eligible, examined for eligibility, confirmed eligible, included in the study, completing follow-up, and analysed<br><a href="#">Page 12, line 4 - Page 13, line 18</a><br><a href="#">Figure 1</a> |
|                   |     | (b) Give reasons for non-participation at each stage<br><a href="#">Page 12, line 4 - Page 13, line 18</a>                                                                                                                                                                          |
|                   |     | (c) Consider use of a flow diagram<br><a href="#">Figure 1</a>                                                                                                                                                                                                                      |
| Descriptive data  | 14* | (a) Give characteristics of study participants (eg demographic, clinical, social) and information on exposures and potential confounders<br><a href="#">Page 12, line 7 – Page 13, line 6</a>                                                                                       |
|                   |     | (b) Indicate number of participants with missing data for each variable of interest<br><a href="#">Page 12, line 4 – Page 13, line 4</a>                                                                                                                                            |
|                   |     | (c) <i>Cohort study</i> —Summarise follow-up time (eg, average and total amount)<br><a href="#">Table 1</a>                                                                                                                                                                         |
| Outcome data      | 15* | <i>Cohort study</i> —Report numbers of outcome events or summary measures over time                                                                                                                                                                                                 |
|                   |     | <i>Case-control study</i> —Report numbers in each exposure category, or summary measures of exposure                                                                                                                                                                                |
|                   |     | <i>Cross-sectional study</i> —Report numbers of outcome events or summary measures<br><a href="#">Tables 1,2,3 and 4</a><br><a href="#">Pages 13-15</a>                                                                                                                             |
| Main results      | 16  | (a) Give unadjusted estimates and, if applicable, confounder-adjusted estimates and their precision (eg, 95% confidence interval). Make clear which confounders were adjusted for and why they were included<br><a href="#">Tables 2,3 and 4</a><br><a href="#">Pages 14-15</a>     |
|                   |     | (b) Report category boundaries when continuous variables were categorized<br><a href="#">Tables 2,3 and 4</a><br><a href="#">Pages 14-15</a>                                                                                                                                        |
|                   |     | (c) If relevant, consider translating estimates of relative risk into absolute risk for a meaningful time period<br><a href="#">NA</a>                                                                                                                                              |
| Other analyses    | 17  | Report other analyses done—eg analyses of subgroups and interactions, and sensitivity analyses<br><a href="#">Page 15, line 13-23</a>                                                                                                                                               |
| <b>Discussion</b> |     |                                                                                                                                                                                                                                                                                     |
| Key results       | 18  | Summarise key results with reference to study objectives<br><a href="#">Page 60, line 3-11</a>                                                                                                                                                                                      |
| Limitations       | 19  | Discuss limitations of the study, taking into account sources of potential bias or imprecision. Discuss both direction and magnitude of any potential bias<br><a href="#">Pages 17, line 9 -19, line 14</a>                                                                         |
| Interpretation    | 20  | Give a cautious overall interpretation of results considering objectives, limitations, multiplicity of analyses, results from similar studies, and other relevant evidence<br><a href="#">Pages 16-21</a>                                                                           |

1  
2 Generalisability 21 Discuss the generalisability (external validity) of the study results

3 [Page 20, line 16 – Page 21, line 4](#)

---

4 **Other information**

5  
6 Funding 22 Give the source of funding and the role of the funders for the present study and, if applicable,  
7 for the original study on which the present article is based

8 NA

9  
10  
11 \*Give information separately for cases and controls in case-control studies and, if applicable, for exposed and  
12 unexposed groups in cohort and cross-sectional studies.

13  
14 **Note:** An Explanation and Elaboration article discusses each checklist item and gives methodological background and  
15 published examples of transparent reporting. The STROBE checklist is best used in conjunction with this article (freely  
16 available on the Web sites of PLoS Medicine at <http://www.plosmedicine.org/>, Annals of Internal Medicine at  
17 <http://www.annals.org/>, and Epidemiology at <http://www.epidem.com/>). Information on the STROBE Initiative is  
18 available at [www.strobe-statement.org](http://www.strobe-statement.org).
